1           **Prenatal Bisphenol A Exposure in Mice Induces Multi-tissue Multi-omics**  
2                           **Disruptions Linking to Cardiometabolic Disorders**

3 Le Shu<sup>1,2¶</sup>, Qingying Meng<sup>1¶</sup>, Brandon Tsai<sup>1</sup>, Graciela Diamante<sup>1</sup>, Yen-Wei Chen<sup>3</sup>, Andrew Mikhail<sup>1</sup>, Helen Luk<sup>1</sup>,  
4 Beate Ritz<sup>4,5</sup>, Patrick Allard<sup>3,5</sup>, and Xia Yang<sup>1,2,3,6\*</sup>

5 <sup>1</sup>Department of Integrative Biology and Physiology, University of California, Los Angeles, CA 90095, USA

6 <sup>2</sup>Molecular, Cellular, and Integrative Physiology Interdepartmental Program, University of California, Los  
7 Angeles, CA 90095, USA

8 <sup>3</sup>Molecular Toxicology Interdepartmental Program, University of California, Los Angeles, CA 90095, USA

9 <sup>4</sup>Department of Epidemiology, Fielding School of Public Health, University of California, Los Angeles, CA  
10 90095, USA

11 <sup>5</sup>Institute for Society and Genetics, University of California, Los Angeles, CA 90095, USA

12 <sup>6</sup>Institute for Quantitative and Computational Biosciences, University of California, Los Angeles, CA 90095,  
13 USA

14  
15 **\*Corresponding author:**

16 Email: [xyang123@ucla.edu](mailto:xyang123@ucla.edu) (XY)

17 Address: Department of Integrative Biology and Physiology, University of California, Los Angeles

18 Terasaki Life Sciences Building 2000D

19 Los Angeles, CA 90095

20

21 **¶These authors contributed equally to this work**

22 **Short titles:** BPA Induces Multi-tissue Multi-omics Disruptions

23

24 **Acknowledgment:**

25 LS is supported by UCLA Dissertation Year Fellowship, Eureka Scholarship, Hyde Scholarship, Burroughs

26 Wellcome Fund Inter-School Program in Metabolic Diseases Fellowship, and China Scholarship Council. P.A. is

27 supported by R01 NIH/NIEHS ES02748701 and the Burroughs Wellcome Foundation. XY is supported by NIH

28 DK104363 and NS103088, and Leducq Foundation.

## 29 **Abstract**

30 The health impacts of endocrine disrupting chemicals (EDCs) remain debated and their tissue and molecular  
31 targets are poorly understood. Here, we leveraged systems biology approaches to assess the target tissues,  
32 molecular pathways, and gene regulatory networks associated with prenatal exposure to the model EDC  
33 Bisphenol A (BPA). Prenatal BPA exposure led to scores of transcriptomic and methylomic alterations in the  
34 adipose, hypothalamus, and liver tissues in mouse offspring, with cross-tissue perturbations in lipid metabolism as  
35 well as tissue-specific alterations in histone subunits, glucose metabolism and extracellular matrix. Network  
36 modeling prioritized main molecular targets of BPA, including *Pparg*, *Hnf4a*, *Esr1*, *Srebf1*, and *Fasn*. Lastly,  
37 integrative analyses identified the association of BPA molecular signatures with cardiometabolic phenotypes in  
38 mouse and human. Our multi-tissue, multi-omics investigation provides strong evidence that BPA perturbs  
39 diverse molecular networks in central and peripheral tissues, and offers insights into the molecular targets that  
40 link BPA to human cardiometabolic disorders.

41

42

## 43 **Introduction**

44 A central concept in the Developmental Origins of Health and Disease (DOHaD) states that adverse  
45 environmental exposure during early developmental stages is an important determinant for later onset adverse  
46 health outcomes, even in the absence of continuous exposure in adulthood [1-3]. BPA is one of the most prevalent  
47 environmental metabolic disruptors identified to date with widespread exposure in human populations and likely  
48 plays a role in DOHaD. BPA is used in the production of synthetic polymers, including epoxy resins and  
49 polycarbonates [4]. The advantageous mechanical properties of BPA have resulted in its ubiquitous use in  
50 everyday goods such as plastic bottles and inner coating of canned foods [5, 6]. BPA exposure has been  
51 confirmed in the majority of human populations [7] and has been linked to body weight, obesity, insulin  
52 resistance, diabetes, metabolic syndrome (MetS), and cardiovascular diseases in both human epidemiologic and  
53 animal studies [8-15]. Importantly, it has been suggested that the developing fetus is particularly vulnerable to  
54 BPA exposure [8, 16]. Intrauterine growth retardation (IUGR) has been consistently observed after developmental  
55 BPA exposure at intake doses below the suggested human safety level and has been associated with low birth  
56 weight, elevated adult fat weight and altered glucose homeostasis [8, 17-20]. As a result, BPA has been banned  
57 from baby products in Europe, Canada, and the US. However, BPA is still in use in non-baby products, renewing  
58 concerns with regards to the continuous exposure of populations in addition to the description of its ability to  
59 influence health outcomes, including obesity and MetS, over several generations [21-24]. Together these lines of  
60 evidence support an intriguing hypothesis that BPA may have been a contributing factor to the rise of MetS and  
61 cardiometabolic diseases worldwide in the past decades [25-27].

62 Despite numerous studies connecting BPA with adverse health outcomes, there remain ample conflicting findings,  
63 as summarized by the European Food Safety Agency [28] and the BPA Joint Emerging Science Working Group  
64 of the US FDA. Although inconsistencies across studies might be attributable to non-monotonic dose response,  
65 exposure window difference, and varying susceptibility between testing models [13, 29], there are also several

66 additional layers of complexity and challenges hindering the full dissection of the biological effects of BPA. First,  
67 previous studies examining BPA in various cell types and tissues suggest a broad impact on biological systems  
68 [23, 30-32]. Second, BPA has been found to modulate multidimensional molecular events, such as gene  
69 expression and epigenetic changes, that are functionally important for processes such as metabolism and immune  
70 response [33-38]. However, due to most studies being designed to focus on one factor at a time as well as non-  
71 comparable study designs, it is difficult to directly compare effects across tissues or types of molecular data to  
72 derive the molecular rules of sensitivity to BPA exposures. In a recent National Toxicology Program report,  
73 CLARITY-BPA, where multiple organs were examined, evidence of weight gain and cardiac dysfunctions were  
74 observed, however, the study was designed to be solely descriptive and no mechanism of action was proposed.  
75 These research gaps in our understanding of the pleiotropy of EDCs and toxicant biological actions necessitated  
76 the establishment of the NIEHS TaRGET consortium and a more recent call for the research community to  
77 systemically interrogate multiple omics in multiple tissues to accelerate the discovery of key biological  
78 fingerprints of environmental exposure [39].

79 Here, we address some of the aforementioned limitations of past studies by using a highly integrative approach.  
80 We conducted a multi-tissue, multi-omics systems biology study to examine the systems level influence of  
81 prenatal BPA exposure using modern integrative genomics and network modeling approaches in a mouse model.  
82 We first utilized next-generation sequencing technologies to characterize perturbations in both the transcriptome  
83 and the epigenome across three tissues (white adipose tissue, hypothalamus, liver) in mouse offspring who had  
84 experienced *in utero* exposure to BPA. Based on mounting evidence that genes operate in highly complex tissue-  
85 specific regulatory networks, we hypothesized that prenatal BPA exposure induces genomic and epigenomic  
86 reprogramming in the offspring by affecting the organization and function of tissue-specific gene networks [40-  
87 43]. Using both transcription factor (TF) networks and Bayesian networks, we modeled the dynamics of  
88 transcriptomic and epigenomic signatures and predicted potential regulators that govern the actions of BPA.  
89 Furthermore, the transcriptome, epigenome, and network information were layered upon metabolic phenotypes

90 such as body weight, adiposity, circulating lipids, and glucose levels in the mouse offspring to evaluate disease  
91 association. Lastly, to assess the relevance of the BPA molecular targets identified in our mouse model for human  
92 diseases, we applied integrative genomics to bridge the mouse molecular signatures and genetic disease  
93 association data from human studies. Our study represents a comprehensive data-driven, systems-level  
94 investigation of the molecular and health impact of BPA.

95

## 96 **Results**

### 97 **Prenatal BPA exposure induces intrauterine growth retardation (IUGR) and alterations in** 98 **cardiometabolic phenotypes**

99 As shown in **Fig 1A**, pregnant C57BL/6 mice were exposed to BPA during gestation (day 1 to day 20 post-  
100 conception) via oral gavage at the dosage of 5mg/kg/day, situated below most reported no-observed-adverse-  
101 effect-level (NOAEL) according to toxicity testing  
102 (<https://comptox.epa.gov/dashboard/dsstoxdb/results?search=Bisphenol+A>). This dosage was typically used in  
103 previous studies [23, 44-46], and was chosen as a proof-of-concept for our systems biology study design and to  
104 facilitate comparison with previous studies. Male and female offspring (n = 9 for control and n = 11 for BPA in  
105 male; n = 9 for control and n = 13 for BPA in female, 2-3 mice from 3-4 litters/group; **S1 Fig**) of weaning age (3-  
106 weeks) were examined for a spectrum of metabolic phenotypes (detailed below). We chose the weaning age in  
107 order to investigate early molecular and phenotypic changes in the offspring, which may predispose the offspring  
108 to late onset diseases. Compared with the control group, both male and female offspring from the BPA group  
109 showed significantly lower body weight, indicative of IUGR, a trait that is strongly associated with later life  
110 insulin resistance and obesity risk (**Fig 1B, D**). There were also significant decreases in serum lipid parameters  
111 and an increase in serum glucose level in males (**Fig 1C**), but not in females (**Fig 1E**). The decreases in the lipid

112 parameters at this early developmental stage likely reflect the growth retardation phenotype observed and may  
113 provide feedback signals to predispose the exposed offspring to lipid dysregulation later in life. The phenotypic  
114 differences between BPA and control groups are not the results of litter effect, as offspring from different dams in  
115 each group showed similar patterns (**S1 Fig**).

116

## 117 **Prenatal BPA exposure induces tissue-specific transcriptomic alterations in male weaning** 118 **offspring**

119 To explore the molecular basis underlying the potential health impact of prenatal BPA exposure, we collected  
120 three key metabolic tissues including white adipose tissue, hypothalamus, and liver from male offspring (due to  
121 the stronger observed phenotypes) at 3 weeks. The hypothalamus is the central regulator of endocrine and  
122 metabolic systems, whereas liver and white adipose tissues are critical for energy and metabolic homeostasis. We  
123 used RNA sequencing (RNA-seq) to profile the transcriptome, and identified 86, 93, and 855 differentially  
124 expressed genes (DEGs) in the adipose tissue, hypothalamus, and liver tissue respectively, at false discovery rate  
125 (FDR) < 0.05 (**Fig 2A, S1 Table**). This supports the ability of prenatal BPA exposure to induce large-scale  
126 transcriptomic disruptions in offspring, with the impact appearing to be more prominent in liver. The DEGs were  
127 highly tissue-specific, with only 12 out of the 86 adipose DEGs and 16 out of the 93 hypothalamus DEGs being  
128 found in liver. Interestingly, the hypothalamic DEGs are predominantly up-regulated in the BPA group whereas  
129 the other two tissues did not show such direction bias (**S2 Table**). Only one gene, *Cyp51* (sterol 14-alpha  
130 demethylase), was shared across all three tissues but with different directional changes (upregulated in  
131 hypothalamus and liver, downregulated in adipose) (**Fig 2B**). The *Cyp51* protein catalyzes metabolic reactions  
132 including cholesterol and steroid biosynthesis and biological oxidation [47] and is a critical regulator for testicular  
133 spermatogenesis [48]. The consistent alteration of *Cyp51* across tissues suggests that this gene is a general target  
134 of BPA, with the potential to alter functions related to cholesterol, hormone, and energy metabolism.

135

## 136 **Functional annotation of DEGs in adipose, hypothalamus, and liver tissues**

137 To better understand the biological implications of the BPA exposure related DEGs in individual tissues, we  
138 evaluated the enrichment of DEGs for known biological pathways and functional categories using the  
139 Mergeomics package [49] (**Fig 2C-E**, full results in **S3 Table**). We observed strong enrichment for pathways  
140 related to lipid metabolism (lipid transport, fatty acid metabolism, cholesterol biosynthesis) and energy  
141 metabolism (biological oxidation, TCA cycle) across all three tissues. Most of these pathways appeared to be  
142 upregulated in all three tissues, with the exception of downregulation of genes involved in biological oxidation in  
143 adipose tissue (**Fig 2C-E**). Individual tissues also showed perturbations of unique pathways: PPAR signaling and  
144 arachidonic acid pathways were altered in liver; extracellular matrix related processes were enriched among  
145 hypothalamic DEGs; core histone genes were upregulated in adipose DEGs (**Fig 2C-E**). In addition, triglyceride  
146 biosynthesis and glucose metabolism pathways were also moderately enriched among adipose DEGs, whereas  
147 few changes were seen for genes involved in adipocyte differentiation (**S2 Fig**).

148

## 149 **Replication of the DEG signatures using independent studies**

150 To support the replicability of the differential expression signatures identified in our study, we sought to validate  
151 the signatures using independent expression profiling data deposited on GEO (**S1 Text**, Supplemental Methods).  
152 We identified three GEO datasets - two from GSE26728 [50] and one from GSE43977 [51] (**S3A Fig**) - that  
153 characterized the liver transcriptome following BPA exposure during adulthood. Highlighting the novelty of our  
154 study, we were not able to identify other datasets with the same *in utero* exposure condition tested in our exposure  
155 paradigm, making a direct replication difficult. However, we reasoned that if core mechanisms exist for BPA  
156 regardless of experimental conditions, consistent signals should be derived. We compared the differential



157 expression signatures from the three existing liver studies against ours, and found limited consistency in BPA  
158 signatures across datasets, even for the two datasets that were originated from the same study (GSE26728) (**S3B**  
159 **Fig**). These results support that BPA has condition-specific activities. Nevertheless, 10% of our DEGs were  
160 replicated in the other GEO datasets ( $p < 1e-4$  compared to random expectation via a permutation analysis, **S3C**  
161 **Fig**). *Srebf1* (Sterol Regulatory Element Binding Transcription Factor 1), a key transcription factor in lipid  
162 metabolism, was consistent across all four datasets, along with numerous additional genes consistent in two or  
163 more studies (**S3C Fig**).

164 Next, we compared the enriched pathways among the DEGs from each dataset to evaluate whether distinct study-  
165 specific signatures could converge onto similar biological processes. The replicated pathways across studies  
166 include steroid hormone biosynthesis, retinol metabolism and fatty acid metabolism, suggesting that these  
167 processes were consistently influenced by BPA under varying exposure windows and dosages (**S3D Fig**). At FDR  
168  $< 5\%$ , 56.1% of the significant pathways in our study were replicated in one or more independent studies ( $p < 1e-$   
169  $4$  compared to random expectation via a permutation test, **S3E Fig**). Pair-wise comparison revealed relatively  
170 higher overlap ratios between our study and individual independent studies than between the previous studies,  
171 despite the greater similarity in the study design among the previous studies (**S3E Fig**). Overall, the generally  
172 higher pair-wise replication rates of the biological pathways between our study and independent studies support  
173 the adequate power of our study to reveal core BPA-associated biological pathways implicated in previous  
174 studies.

175

## 176 **Prenatal BPA exposure induces tissue-specific epigenetic alterations in male weaning offspring**

177 Consistent with the observed gene expression disruptions at the transcriptomic level, we observed numerous  
178 methylomic alterations using reduced representation bisulfite sequencing (RRBS), which characterizes DNA  
179 methylation states of millions of potential epigenetic sites at single base resolution. At FDR  $< 5\%$ , 5136, 104, and

180 476 differentially methylated CpGs (DMCs) were found in adipose, hypothalamus, and liver tissues, respectively  
181 (**Fig 3A, S4 Table**). When comparing our adipose methylation signatures with a previous study [36], we were  
182 able to replicate 5 out of 7 peak hypomethylated genes, and 6 out of 9 peak hypermethylated genes. Interestingly,  
183 BPA induced local methylation changes in *Gm26917* and *Yam1*, two long non-coding RNAs (lncRNAs) with no  
184 previously known link to BPA, consistently across three tissues (**Fig 3B**). The majority of the DMCs are located  
185 in intergenic regions (32% - 38%), followed by introns (31% - 37%) and exons (13% - 15%), but there is a  
186 paucity of DMCs in the promoter region (3% - 5%) (**S4 Fig**). Contrary to predictions that promoter regions may  
187 be more prone to epigenetic changes, we found that within-gene and intergenic methylation alterations in DNA  
188 methylation are more prevalent, a pattern consistently observed in previous epigenomic studies [41, 52]. In  
189 addition, 5.0%, 8.6%, and 8.1% DMCs overlap with repetitive DNA elements in adipose, hypothalamus, and  
190 liver, respectively, recapitulating previous report of the interaction between BPA and repetitive DNA [53].  
191 For DMCs that are located within or adjacent to genes, we further tested whether the local genes adjacent to those  
192 DMCs show enrichment for known functional categories. Unlike DEGs, top processes enriched for DMCs  
193 concentrated on intra- and extra-cellular communication and signaling related pathways such as axon guidance,  
194 extracellular matrix organization and NGF signaling (**Fig 3C, full results in S5 Table**). The affected genes in  
195 these processes are related to cellular structure, cell adhesion, and cell migration, indicating that these functions  
196 may be particularly vulnerable to BPA induced epigenetic modulation.

197

### 198 **Potential regulatory role of DMCs in transcriptional regulation of BPA induced DEGs**

199 To explore the role of DMCs in regulating DEGs, we evaluated the connection between transcriptome and  
200 methylome by correlating the expression level of DEGs with the methylation ratio of their local DMCs. For the  
201 DEGs in adipose, hypothalamus and liver tissue, we identified 42, 36, and 278 local DMCs whose methylation  
202 ratios were significantly correlated with the gene expression. At a global level, compared to non-DEGs, DEGs are

203 more likely to contain local correlated DMCs (**S5 Fig**). A closer look into the expression-methylation correlation  
204 by different chromosomal regions further revealed a context dependent correlation pattern (**Fig 3D**). In adipose  
205 and liver, the 3-5% of DMCs in promoter regions tend to show significant enrichment for negative correlation  
206 with DEGs, whereas gene body methylations for DEGs are more likely to show significant enrichment for  
207 positive correlation with gene expression. In hypothalamus, however, positive correlations between DEGs and  
208 DMCs are more prevalent across different gene regions. In addition, liver DMCs within lncRNAs were uniquely  
209 enriched for negative correlation with lncRNA expression, although the lack of a reliable mouse lncRNA target  
210 database prevented us from further investigating whether downstream targets of the lncRNAs were enriched in the  
211 DEGs. Specific examples of DEGs showing significant correlation with local DMCs include adipose DEG  
212 *Slc25a1* (Solute Carrier Family 25 Member 1, involved in triglyceride biosynthesis), hypothalamic DEG *Mvk*  
213 (Mevalonate Kinase, involved in cholesterol biosynthesis), and liver DEG *Gm20319* (a lncRNA with unknown  
214 function) (**S6 Fig and S6 Table**). These results support a role of BPA-induced differential methylation in altering  
215 the expression levels of adjacent genes.

216

### 217 **Pervasive influence of prenatal BPA exposure on the liver transcription factor network**

218 BPA is known to bind to diverse types of nuclear receptors such as estrogen receptors and peroxisome  
219 proliferator-activated (PPAR) receptors that function as transcription factors (TFs), thus influencing the action of  
220 downstream genes [54, 55]. *PPARG* in particular has been shown to be a target of BPA in mouse and human and  
221 mechanistically linking BPA exposure with its associated effect on weight gain and increased adipogenesis [56-  
222 58]. To explore the TF regulatory landscape underlying BPA exposure based on our genome-wide data, we  
223 leveraged tissue-specific TF regulatory networks from the FANTOM5 project [59] and integrated it with our BPA  
224 transcriptome profiling data. No TF was found to be differentially expressed in adipose tissue, whereas 1 TF  
225 (*Pou3f1*) and 14 TFs (such as *Esrra*, *Hnf1a*, *Pparg*, *Tcf21*, *Srebf1*) were found to be differentially expressed in

226 hypothalamus and liver, respectively. Due to the temporal nature of TF action, changes in TF levels may precede  
227 the downstream target genes and not be reflected in the transcriptomic profiles measured at the time of sacrifice.  
228 Therefore, we further curated the target genes of TFs from FANTOM5 networks and tested the enrichment for the  
229 target genes of each TF among our tissue-specific DEGs (**S7 Table**). This analysis confirmed that BPA perturbs  
230 the activity of the downstream targets for estrogen receptors *Esrrg* ( $p = 1.4e-3$ , FDR = 1.9%) and *Esrra* ( $p = 0.03$ ,  
231 FDR = 13%) in liver, as well as *Esr1* in both adipose ( $p = 7.2e-3$ , FDR = 10.6%) and liver ( $p = 7.2e-3$ , FDR =  
232 4.7%). Targets of *Pparg* were also perturbed in liver ( $p = 4.1e-3$ , FDR = 3.8%). Therefore, we demonstrated that  
233 our data-driven network modeling is able to not only recapitulate results from previous *in-vitro* and *in-vivo* studies  
234 showing that BPA influences estrogen signaling and PPAR signaling [55], but also uniquely point to the tissue  
235 specificity of these BPA target TFs.

236 In addition to these expected TFs, we identified 14 adipose TFs and 61 liver TFs whose target genes were  
237 significantly enriched for BPA DEGs at FDR < 5%. Many of these TFs showed much stronger enrichment for  
238 BPA DEGs among their downstream targets than the estrogen receptors (**S7 Table**). The adipose TFs include  
239 nuclear transcription factor Y subunit alpha (*Nfya*) and fatty acid synthase (*Fasn*), both implicated in the  
240 adipocyte energy metabolism [60]. The liver TFs include multiple genes from the hepatocyte nuclear factors  
241 (HNF) family and the CCAAT-enhancer-binding proteins (CEBP) family, which are critical for liver development  
242 and function, suggesting a pervasive influence of BPA on liver TF regulation.

243 We further extracted the subnetwork containing 89 unique downstream targets of the significant liver TFs that are  
244 also liver DEGs. This subnetwork showed significant enrichment for genes involved in metabolic pathways such  
245 as steroid hormone biosynthesis and fatty acid metabolism. The regulatory subnetwork for the top liver TFs (FDR  
246 < 5%) revealed a highly interconnected TF subnetwork that potentially senses BPA exposure and in turn governs  
247 the expression levels of their targets (**Fig 4A**), with *Pparg* and *Hnf4* among the core TFs. Some of the TFs in this  
248 network, including *Esr1*, *Esrrg*, *Foxp1*, and *Tcf7l1*, also had local DMCs identified in our study, indicating that  
249 BPA may perturb this liver TF subnetwork via local modification of DNA methylation of key TFs.

250

## 251 **Identification of potential non-TF regulators governing BPA induced molecular perturbations**

252 To further identify regulatory genes that mediate the action of BPA on downstream targets through non-TF  
253 mechanisms, we leveraged data-driven tissue-specific Bayesian networks (BNs) generated from multiple  
254 independent human and mouse studies (**S8 Table**). These data-driven networks are complementary to the TF  
255 networks used above and have proven valuable for accurately predicting gene-gene regulatory relationships and  
256 novel key drivers (KDs) [40-43, 61]. KDs were defined as network nodes whose surrounding subnetworks are  
257 significantly enriched for BPA exposure related DEGs. At FDR < 1%, we identified 21, 1, and 100 KDs in  
258 adipose, hypothalamus, and liver, respectively (**S9 Table**). The top KDs in adipose (top 5 KDs *Acss2*, *Pc*, *Agpat2*,  
259 *Slc25a1*, *Acly*), hypothalamus (*Fa2h*) and liver (top 5 KDs *Dhcr7*, *Aldh3a2*, *Fdft1*, *Mtmr11*, *Hmgcr*) were  
260 involved in cholesterol, fatty acid and glucose metabolism processes. In addition, three KDs, *Acss2* (Acetyl-  
261 Coenzyme A Synthetase 2), *Acat2* (Acetyl-CoA Acetyltransferase 2), and *Fasn* (Fatty Acid Synthase), were  
262 involved in the upregulation of DEGs in both adipose and liver, despite the fact that few DEG signatures overlap  
263 across tissues (**Fig 4B**). These KDs are consistent with the observed increased expression of several genes  
264 implicated in lipogenesis, including *Fasn*, and help explain the liver accumulation of triglycerides when mice are  
265 exposed to BPA [50]. Together, these results indicate that BPA may engage certain common regulators which  
266 have tissue-specific targets. The distinct upregulatory pattern within the subnetworks of individual KDs supports  
267 the potential functional importance of KDs in orchestrating the action of downstream genes. These KDs, along  
268 with the newly identified TFs from the above analysis, may represent novel regulatory targets which transmit the  
269 *in vivo* biological effects of BPA.

270

## 271 **BPA transcriptomic and methylomic signatures are related to metabolic traits in mice**

272 To assess the relationship between the BPA molecular signatures and metabolic traits in the mouse model, the  
273 DEGs and DMCs from individual tissues were tested for correlation with the measured metabolic traits: body  
274 weight, free fatty acids (FFA), total cholesterol (TC), high density lipoprotein cholesterol (HDL), triglycerides  
275 (TG) and blood glucose. At  $p < 0.05$ , over two thirds of tissue-specific DEGs and over 60% DMCs were  
276 identified to be correlated with at least one metabolic trait (**Fig 5A, B**). Notably, liver DEGs exhibited stronger  
277 correlation with free fatty acid and triglycerides, whereas adipose DEGs were uniquely associated with glucose  
278 level, which is consistent with the pathway annotation results for these tissues. On the other hand, liver DMCs  
279 showed stronger correlations with metabolic traits than those from adipose and hypothalamus tissues.

280 Cross-examination of correlation across gene expression, DNA methylation, and metabolic traits revealed 35  
281 consistent DEG-DMC-trait associations (3 in adipose, 4 in hypothalamus, and 28 in liver) (**S10 Table**). For  
282 example, in adipose tissue, *Fasn* (also a perturbed TF hotspot in adipose, and a shared KD in adipose and liver)  
283 was correlated with its exonic DMC at chr11:120816457, and both were correlated with triglyceride level; in  
284 hypothalamus, *Igf1r* (Insulin Like Growth Factor 1 Receptor) was correlated with its intronic DMC at  
285 chr7:68072768, and both were correlated with blood glucose level; in liver, *Adh1* (Alcohol Dehydrogenase 1A)  
286 was correlated with its intronic DMC at chr3:138287690, and both were correlated with body weight (**Fig 5C**).  
287 These results suggest that BPA alters local DMCs of certain genes to regulate gene expression, which may in turn  
288 regulate distinct metabolic traits.

## 289 290 **Relevance of BPA signature to human complex traits/diseases**

291 Human observational studies have associated developmental BPA exposure with a wide variety of human  
292 diseases ranging from cardiometabolic diseases to neuropsychiatric disorders [14, 15, 62]. Large-scale human  
293 genome-wide association studies offer an unbiased view of the genetic architecture for various human

294 traits/diseases, and intersections of the molecular footprints of BPA in our mouse study with human disease risk  
295 genes can help infer the potential disease-causing properties of BPA in humans. From the GWAS Catalog [63],  
296 we collected associated genes for 161 human traits/diseases (traits with fewer than 50 associated genes were  
297 excluded), and evaluated the enrichment for the trait associated genes among DEG and DMC signatures. At FDR  
298 < 5%, no trait was found to be significantly enriched for BPA DEGs. Surprisingly, despite the difference between  
299 tissue-specific DMCs (**Fig 3B**), 19 out the 161 traits showed consistently strong enrichment for DMCs across all  
300 three tissues at FDR < 1%. The top traits include body mass index (BMI) and type 2 diabetes (**Table 1**). As DNA  
301 methylation status is known to determine long-term gene expression pattern instead of immediate dynamic gene  
302 regulation, the BMI and diabetes associated genes may be under long-term programming by BPA-induced  
303 differential methylation, thereby affecting later disease risks.

304 The above analysis involving the GWAS catalog focused only on small sets of the top candidate genes for various  
305 diseases and may have limited statistical power. To improve the statistical power, we curated the full summary  
306 statistics from 61 human GWAS that are publicly available (covering millions of SNP-trait associations in each  
307 GWAS), which enabled us to extend the assessment of disease association by considering additional human  
308 disease genes with moderate to low effect sizes (**Methods**). This analysis showed that DEGs from all three tissues  
309 exhibited consistent enrichment for genes associated with lipid traits such as triglycerides, LDL, and HDL (**Fig**  
310 **6A-C**). Interestingly, enrichment for birth weight and birth length was also observed for hypothalamus and liver  
311 signatures, respectively. Liver DEGs were also significantly associated with coronary artery disease,  
312 inflammatory bowel disease, Alzheimer's disease, and schizophrenia. Top DEGs driving the inflammatory bowel  
313 disease association involve immune and inflammatory response genes (*PSMB9*, *TAP1*, *TNF*), whereas association  
314 with Alzheimer's disease and schizophrenia involve genes related to cholesterol homeostasis (*APOA4*, *ABCG8*,  
315 *SOAT2*) and mitochondrial function (*GCDH*, *PDPR*, *SHMT2*), respectively. These results suggest that tissue-  
316 specific targets of BPA are connected to diverse human complex diseases through both the central nervous system  
317 and peripheral tissues.

318

## 319 **Discussion**

320 This multi-tissue, multi-omics integrative study represents one of the first systems biology investigations of  
321 prenatal BPA exposure. By integrating systematic profiling of the transcriptome and methylome of multiple  
322 metabolic tissues with phenotypic trait measurements, large-scale human association datasets, and network  
323 analysis, we uncovered insights into the molecular regulatory mechanisms underlying the health effect of prenatal  
324 BPA exposure. Specifically, we identified tens to hundreds of tissue-specific DEGs and DMCs involved in  
325 diverse biological functions such as metabolic pathways (oxidative phosphorylation/TCA cycle, fatty acid,  
326 cholesterol, glucose metabolism, and PPAR signaling), extracellular matrix, focal adhesion, and inflammation  
327 (arachidonic acid), with DMCs partially explaining the regulation of DEGs. Network analysis helped reveal  
328 potential regulatory circuits post BPA exposure and pinpointed both tissue-specific and cross-tissue regulators of  
329 BPA activities, including TFs such as estrogen receptors, *PPARg*, and *HNF1A*, and non-TF key drivers such as  
330 *FASN*. Furthermore, the BPA gene signatures and the predicted regulators were found to be linked to a wide  
331 spectrum of disease-related traits in both mouse and human.

332 The large-scale disruption we observed in the transcriptome and methylome in adipose and liver was consistent  
333 with previous reports [33, 36, 64, 65]. Although our multi-tissue, multi-omics design limits the number of  
334 biological replicates we could have for each group, comparison of our results with previously published BPA  
335 studies with various study designs revealed consistent signals such as *Srebf1* in liver and a generally higher  
336 replication rate of the biological pathways between our study and the other studies than replication between the  
337 previously studies. Additionally, we focused our analyses on evaluating the aggregated behavior of BPA  
338 signatures using both pathway analysis and network modeling to reduce the potential noise and false positives at  
339 individual gene level, because the random chance to have multiple genes in the same pathway to be false positives  
340 is much lower. At the pathway level, we demonstrate the robustness of our results against published studies,



341 supporting that relatively small sample size did not hinder our ability to uncover reliable biology despite variation  
342 at the individual signature level across studies. Moreover, our unique study design of examining multi-omics in  
343 multiple tissues in parallel yields higher comparability when integrating the results between data types and across  
344 tissues, as they were from the same set of animals and were profiled in the same conditions. Of note, the low  
345 consistency of DEGs across independent BPA studies points to the complexity of BPA actions under varying  
346 conditions, and warrants future large-scale coordinated investigations by the research community to  
347 systematically evaluate the molecular footprints of BPA.

348 Across all three tissues at the transcriptome level, we found that lipid metabolism and energy homeostasis related  
349 processes were consistently perturbed, with the scale of perturbation being strongest in liver. This aligns well with  
350 the significant changes in the plasma lipid profiles we observed in the offspring, the reported perturbation of lipid  
351 metabolism in fetal murine liver [65], and the reported susceptibility for nonalcoholic fatty liver diseases  
352 following BPA exposure [66-68]. The only shared gene across tissues, *Cyp51*, is involved in cholesterol and sterol  
353 biosynthesis and beta oxidation, and the only liver signature replicated across our and three previous studies and a  
354 top ranked TF regulator in our TF analysis, *Srebf1*, is a main regulator of lipid homeostasis, again supporting that  
355 metabolism is a central target of BPA. We also revealed an intriguing link between BPA and lncRNAs across  
356 tissues, whose functional importance in developmental processes, disease progression, and response to BPA  
357 exposure was increasingly recognized yet underexplored [69]. Our molecular data provides intriguing lncRNA  
358 candidates such as *Gm20319*, *Gm26917*, and *Yam1* for future in-depth functional analyses.

359 For adipose tissue, clusters of genes responsible for core histones were found to be uniquely altered. Along with  
360 the strong adipose-specific differential methylation status, our results revealed gonadal adipose tissues as an  
361 especially vulnerable site for BPA induced epigenetic reprogramming. Besides, developmental BPA exposure has  
362 been previously suggested to influence white adipocyte differentiation [70-72]. However, the adipocyte  
363 differentiation pathway was not significantly enriched in our study. This is consistent with the report by Angel et  
364 al. [72], where increased adipocyte number is only found in mouse offspring with prenatal BPA exposure at

365 5ug/kg/day and 500ug/kg/day, but not 5mg/kg/day. Additionally, we found significant enrichment for triglyceride  
366 biosynthesis and glucose metabolism genes at the differential methylation sites, suggesting that prenatal BPA  
367 exposure may affect fat storage and glucose homeostasis in the adipose tissue. Although here we mainly  
368 investigate gonadal adipose tissue as a surrogate for abdominal fat in the context of metabolic disorders, the  
369 information may be useful for exploring the relationship between this fat depot and the gonad.

370 With regards to the hypothalamus, our study is the first to investigate the effect of BPA on the hypothalamic  
371 transcriptome and DNA methylome. Hypothalamus is an essential brain region that regulates the endocrine  
372 system, peripheral metabolism, and numerous brain functions. We identified BPA-induced DEGs and DMCs that  
373 were enriched for extracellular matrix related processes such as axon guidance, focal adhesion, and various  
374 metabolic processes. These hypothalamic pathways have been previously associated with metabolic [41, 42] and  
375 neurodegenerative diseases [41, 73], and they could underlie the reported disruption of hypothalamic  
376 melanocortin circuitry after BPA exposure [74]. Our study highlights the hypothalamus as another critical yet  
377 under-recognized target for BPA.

378 By interrogating both the transcriptome and DNA methylome in matching tissues, we were able to directly assess  
379 both global and specific correlative relationships between DEGs and DMCs (**S5 Fig, Fig 3D**). Specifically, we  
380 found that DEGs are more likely to have correlated DMCs in the matching tissue, a trend that persists in non-  
381 promoter regions. Our results corroborate previous findings regarding the importance of gene body methylation in  
382 disease etiology [75, 76]. Given that over 90% of DMCs were found in non-promoter regions, closer investigation  
383 of the regulatory circuits involving these regions may unveil new insights into BPA response [52].

384 Known as an endocrine disrupting chemical, BPA has been speculated to exert its primary biological action by  
385 modifying the activity of hormone receptors, including estrogen receptors, PPAR $\gamma$  and glucocorticoid receptors  
386 [55]. Indeed, the activity for the downstream targets of Pparg and three estrogen and estrogen-related receptors  
387 were found to be disrupted in liver by prenatal BPA exposure. More importantly, our unbiased data-driven

388 analysis revealed many novel transcription factors and non-TF regulatory genes that also likely mediate BPA  
389 effects. In fact, many of the newly identified TF targets of BPA, such as *Fasn*, *Srebf1*, and several hepatic nuclear  
390 factors, showed much higher ranking in our regulator prediction analyses. In liver, a tightly inter-connected TF  
391 subnetwork was highly concentrated with BPA affected genes involved in metabolic processes such as  
392 cytochrome P450 system (*Cyp3a25*, *Cyp2a12*, *Cyp1a2*), lipid (*Apoa4*, *Abcg5*, *Soat2*) and glucose (*Hnf1a*,  
393 *Adra1b*, *Gck*) regulation, with extensive footprints of altered methylation status in the TFs and other subnetwork  
394 genes (**Fig 4A**). Therefore, our results support a widespread impact of BPA on liver transcriptional regulation, and  
395 the convergence of differential methylation and gene expression in this TF subnetwork implies that BPA perturbs  
396 this subnetwork via epigenetic regulation of the TFs, which in turn trigger transcriptomic alterations in  
397 downstream genes. In adipose, we discovered a regulatory axis governed by *Nfya* and *Fasn* that are known  
398 regulators of fatty acid metabolism and adipogenesis. NF-YA is a histone-fold domain protein that binds to the  
399 inverted CCAAT element in the *Fasn* promoter [60, 77], and both *Nfya* and *Fasn* were found to significantly  
400 perturbed by BPA in our study. Moreover, *Fasn* also serves as a cross-tissue KD, governing distinct groups of up-  
401 regulated lipid metabolism genes in adipose and liver post-BPA exposure (**Fig 4B**), supporting its role in  
402 mediating the BPA-induced lipid dysregulation at the systemic level. The significant correlation of gene  
403 expression and methylation for *Fasn* with triglyceride level furthers implicates its role as a network-level  
404 regulator and biomarker for BPA induced lipid dysregulation. Our observation of *Fasn* is consistent with  
405 evidences suggesting its susceptibility to methylation perturbation under obesogenic feeding [78] and its causal  
406 functional importance for fatty liver diseases [43, 79]. These novel regulators warrant future experimental testing  
407 of their causal regulatory role in BPA activities via genetic manipulation studies, such as knocking down or  
408 overexpressing *Fasn* to examine the modulation of BPA activities.

409 One unique aspect of this study is the linking of the molecular landscape of prenatal BPA exposure to  
410 traits/diseases in both mouse and human. In our mouse study, the observed changes in body weight, lipid profiles,  
411 and glucose level are highly concordant with the functions of the molecular targets. For instance, prenatal BPA

412 exposure perturbs both the expression levels and the local DNA methylation status of *Fasn*, *Igf1r*, and *Adh1*.  
413 These DEGs and their local DMCs also significantly correlate with phenotypic outcomes, thus serving as  
414 examples of how DNA methylation and gene regulation bridge the gap between BPA exposure and phenotypic  
415 manifestation. To further enhance the translatability of our findings from mouse to human, we searched for  
416 human diseases linked to the BPA-affected genes. An intriguing discovery is the prominent overrepresentation of  
417 differential methylation signals in adipose, hypothalamus, and liver within known genes related to obesity and  
418 type 2 diabetes, supporting that BPA may impact obesity and diabetes risk through systemic reprogramming of  
419 DNA methylation. More sophisticated analysis incorporating the BPA differential gene expression and the full  
420 statistics of human genome-wide association studies corroborated the observed connection between prenatal BPA  
421 exposure and lipid homeostasis [80], birth weight [81], and coronary artery disease [14] reported in observational  
422 studies. Moreover, our findings suggest the involvement of prenatal BPA exposure in the development of  
423 inflammatory bowel syndrome, schizophrenia, and Alzheimer's disease. These associations warrant future  
424 investigations.

425 One limitation of our work is the restriction of study scope to weaning age male mice with *in utero* BPA exposure  
426 below the NOAEL (5mg/kg/d) as a proof-of-concept for our systems biology framework. Considering that the  
427 effects of early-life exposure to BPA is highly variable and dependent on factors such as the dose, window, route,  
428 and frequency of exposure as well as genetic background, age, and sex [13], future studies testing these additional  
429 variables using large sample sizes are necessary to generate a comprehensive understandings of BPA risks under  
430 various exposure conditions.

431

## 432 **Conclusions**

433 Our study represents the first multi-tissue, multi-omics integrative investigation of prenatal BPA exposure. The  
434 systems biology framework we applied revealed how BPA triggers cascades of regulatory circuits involving

435 numerous transcription factors and non-TF regulators that coordinate diverse molecular processes within and  
436 across core metabolic tissues, thereby highlighting that BPA exerts its biological functions via much more diverse  
437 targets than previously thought. As such, our findings offer a comprehensive systems-level understanding of  
438 tissue sensitivity and molecular perturbations elicited by prenatal BPA exposure, and offer promising novel  
439 candidates for targeted mechanistic investigation as well as much-needed network-level biomarkers of prior BPA  
440 exposure. The strong influence of BPA on metabolic pathways and cardiometabolic phenotypes merits its  
441 characterization as a general metabolic disruptor posing systemic health risks.

## 442 **Methods**

### 443 **Ethics statement**

444 All animal experiments were performed in accordance with the Institutional Animal Care and Use Committee  
445 (IACUC) guidelines. Animal studies and procedures were approved by the Chancellor's Animal Research  
446 Committee of the University of California, Los Angeles (Protocol #2012-059-21).

### 447 **Mouse model of prenatal BPA exposure**

448 Inbred C57BL/6 mice were maintained on a special diet 5V01 (LabDiet), certified to contain less than 150ppm  
449 estrogenic isoflavones, and housed under standard housing conditions (room temperature 22–24°C) with 12:12 hr  
450 light:dark cycle before mating at 8-10 weeks of age. Upon mating, female mice were randomly assigned to either  
451 the BPA treatment group or the control group. From 1-day post-conception (dpc) to 20 dpc, BPA (Sigma-Aldrich,  
452 St. Louis, MO) dissolved in corn oil was administered to pregnant female mice via oral gavage (mimicking  
453 common exposure route in humans) at 5mg/kg/day on a daily basis. Control mice were fed the same amount of  
454 empty vehicle. BPA exposure was restricted to experimental manipulation through the use of polycarbonate-free  
455 water bottles and cages. Offspring from each treatment were maintained on a standard chow diet (Newco

456 Distributors Inc, Rancho Cucamonga, CA). Offspring in the vehicle- and BPA-treated groups were derived from 3  
457 and 4 litters by different dams, respectively, to help assess and adjust for litter effects.

#### 458 **Characterization of cardiometabolic phenotypes and tissue collection**

459 Body weight of offspring was measured daily from postnatal day 5 up to the weaning age of 3 weeks. Mice were  
460 fasted overnight before sacrifice, and plasma samples were collected through retro-orbital bleeding. Serum lipid  
461 and glucose traits including total cholesterol, HDL, un-esterified cholesterol (UC), TG, FFA, and glucose were  
462 measured by enzymatic colorimetric assays at UCLA GTM Mouse Transfer Core as previously described [41].  
463 Gonadal white adipose tissue, hypothalamus, and liver tissues were collected from each animal, flash frozen in  
464 liquid nitrogen, and stored at  $-80^{\circ}\text{C}$ . For white adipose tissue, we chose the gonadal depot mainly due to its  
465 similarity to abdominal fat, established relevance to cardiometabolic risks, tissue abundance, and the fact that it is  
466 the most well-studied adipose tissue in mouse models. All mouse experiments were conducted in accordance with  
467 and approved by the Institutional Animal Care and Use Committee at University of California, Los Angeles.

#### 468 **RNA sequencing (RNA-seq) and data analysis**

469 A total of 18 RNA samples were isolated from gonadal adipose, hypothalamus and liver tissues ( $n = 3$  per group  
470 per tissue; for each group, mice were randomly selected from litters of different dams in independent cages) from  
471 male offspring using the AllPrep DNA/RNA Mini Kit (QIAGEN GmbH, Hilden, Germany). We focused on  
472 profiling male tissues because of stronger phenotypes observed in males (**Fig 1B-E**). Samples were processed for  
473 library preparation using TruSeq RNA Library Preparation Kit (Illumina, San Diego, CA) for poly-A selection,  
474 fragmentation, and reverse transcription using random hexamer-primers to generate first-strand cDNA. Second-  
475 strand cDNA was generated using RNase H and DNA polymerases, and sequencing adapters were ligated using  
476 the Illumina Paired-End sample prep kit. Library products of 250-400bp fragments were isolated, amplified, and  
477 sequenced with Illumina HiSeq2500 System. After quality control using FastQC [82], the HISAT-StringTie  
478 pipeline [83] was used for sequence alignment and transcript assembly. Identification of DEGs were conducted

479 using DEseq2 [84]. To account for multiple testing, we used the q-value method [85]. After excluding genes with  
480 extremely low expression levels (FPKM < 1), only DEGs demonstrating differential expression comparing the  
481 BPA and control groups per tissue at an FDR < 5% were used for biological pathway analysis, network analysis,  
482 and phenotypic data integration, as described below.

### 483 **Reduced representation bisulfite sequencing (RRBS) and data analysis**

484 We constructed RRBS libraries for 18 DNA samples from adipose, hypothalamus and liver tissues from male  
485 offspring (n = 3 per group per tissue from the same set of tissues chosen for transcriptome analysis described  
486 above). The DNA samples were quantified using the dsDNA BR assay (Qubit, Waltham, MA) and 100ng of DNA  
487 was used for library preparation. After digestion of the DNA with the MspI enzyme, samples underwent an end-  
488 repair and adenylation process, followed by adapter ligation using the Truseq barcode adapter (Illumina, San  
489 Diego, CA), size selection using AMPure Beads (Beckman Coulter, Brea, CA), and bisulfite treatment using the  
490 Epiect Kit (Qiagen, Germantown, MD). Bisulfite-treated DNA was then amplified using the Truseq Library Prep  
491 Kit (Illumina, San Diego, CA) and sequenced with the Illumina Hiseq2500 System. Bisulfite-converted reads  
492 were processed and aligned to the reference mouse genome (GRCm38/mm10 build) using the bisulfite aligner  
493 BSMAP [86]. We then used MOAB [87] for methylation ratio calling and identification of DMCs. FDR was  
494 estimated using the q-value approach. Loci with methylation level changes of > 5% between BPA and control  
495 groups and FDR < 0.05 for each tissue were considered statistically significant DMCs. To annotate the locations  
496 of the identified DMCs in relation to gene regions and repetitive DNA elements accessed from UCSC genome  
497 browser, we used the Bioconductor package “annotatr” [88]. Specifically, gene regions were categorized into 1)  
498 1-5kb upstream of the transcription start site (TSS), 2) promoter (< 1kb upstream of the TSS), 3) 5’ untranslated  
499 region (UTR), 4) exons, 5) introns, and 6) 3’UTR. The “annotatr” package was also used to annotate DMCs for  
500 known lncRNAs based on GENCODE Release M16. Over-representation of DMCs within each category was  
501 calculated using Fisher’s exact test. We further evaluated the link between DEGs and their local DMCs (DMCs

502 annotated as any of the 6 above mentioned gene regions) by correlating the methylation ratio of DMCs with the  
503 expression level of DEGs.

## 504 **Pathway, network, and disease association analyses of DEGs and DMCs using the Mergeomics R** 505 **package**

506 To investigate the functional connections among the BPA-associated DEGs or DMCs (collectively referred to as  
507 molecular signatures of BPAs) and to assess the potential association of BPA affected genes with diseases in  
508 human populations, we utilized the Mergeomics package [49], an open-source bioconductor package  
509 (<https://bioconductor.org/packages/devel/bioc/html/Mergeomics.html>) designed to perform various integrative  
510 analyses in multi-omics studies. Mergeomics consists of two main libraries, Marker Set Enrichment Analysis  
511 (MSEA) and Weighted Key Driver Analysis (wKDA). In the current study, we used MSEA to assess 1) whether  
512 known biological processes, pathways or transcription factor targets were enriched for BPA molecular signatures  
513 as a means to annotate the potential functions or regulators of the molecular signatures, and 2) whether the BPA  
514 signatures demonstrate enrichment for disease associations identified in human genome-wide association studies  
515 (GWAS) of various complex diseases (**S7 Fig**). wKDA leverages gene network topology (interactions or  
516 regulatory relations among genes) and edge weight (strength or reliability of interactions and regulatory relations)  
517 information of graphical gene networks to predict potential key regulators of a given group of genes, in this case,  
518 the BPA-associated DEGs (**S8 Fig**). Both MSEA and wKDA were built around a chi-square like statistics (**S1**  
519 **Text**) that yields robust findings that have been experimentally validated [42, 43, 49]. Details of each usage of the  
520 Mergeomics package are discussed below.

## 521 **Functional annotation of DEGs and DMCs**

522 To infer the functions of the DEGs and DMCs affected by BPA, we used MSEA to annotate the DEGs or local  
523 genes adjacent to the DMCs with known biological pathways curated from the Kyoto Encyclopedia of Genes and  
524 Genomes (KEGG) [89] and Reactome [90]. In brief, we extracted the differential expression p-values of genes in



525 each pathway from the differential expression or methylation analyses and compared these p-values against the  
526 null distribution of p-values from random gene sets with matching gene numbers. If genes in a given pathway  
527 collectively show more significant differential expression or differential methylation p-values compared to  
528 random genes based on a chi-square like statistic, we annotate the DEGs or DMCs using that pathway (**S1 Text**).  
529 DEGs and DMCs can have multiple over-represented pathways.

### 530 **Identification of transcription factor hotspots perturbed by BPA**

531 To dissect the regulatory cascades of BPA, we first assessed whether BPA-associated DEGs were downstream  
532 targets of specific transcription factors. The hypothesis behind this analysis is that BPA first affects TFs which in  
533 turn regulate the expression of downstream genes. We used TF regulatory networks for adipose, brain, and liver  
534 tissue retrieved from the FANTOM5 database [59]. Note that only a whole brain (instead of hypothalamus) TF  
535 network was available, which may only partially represent hypothalamic gene regulation. Each TF network was  
536 processed to keep the edges with high confidence (**S1 Text**). To identify TFs whose targets were perturbed by  
537 BPA, the downstream nodes of each TF in the network were pooled as the target genes for that TF. We then  
538 assessed the enrichment for BPA exposure related DEGs among the target genes of each TF using MSEA. TFs  
539 with FDR < 5% were considered statistically significant. Cytoscape software was used for TF network  
540 visualization [91].

### 541 **Bayesian network and Weighted Key Driver Analysis (wKDA) to identify potential non-TF** 542 **regulators**

543 To further identify non-TF regulators that sense BPA and then perturb downstream genes, we used Bayesian  
544 networks (BN) of adipose, hypothalamus and liver tissues constructed from genetic and transcriptomic data from  
545 several large-scale mouse and human studies (**S1 Text and S8 Table**). wKDA was used to identify network key  
546 drivers (KDs), which are defined as network nodes whose neighboring subnetworks are significantly enriched for  
547 BPA-associated DEGs. Briefly, wKDA takes gene set G (i.e. BPA DEGs) and directional gene network N (i.e.

548 BNs) as inputs. For every gene K in network N, neighboring genes within 1-edge distance were tested for  
549 enrichment of genes in G using a chi-square like statistics followed by FDR assessment by permutation (**S1 Text**  
550 **and S8 Fig**). Network genes that reached  $FDR < 0.05$  were reported as potential KDs.

### 551 **Association of BPA DEGs and DMCs with mouse phenotypes and human diseases/traits**

552 To assess whether the BPA molecular signatures were related to phenotypes examined in the mouse offspring, we  
553 calculated the Pearson correlation coefficient among expression level of DEGs, methylation ratio of DMCs, and  
554 the measurement of metabolic traits. For human diseases or traits, we accessed the GWAS catalog database [63]  
555 and collected the lists of candidate genes reported to be associated with 161 human traits/diseases ( $P < 1e-5$ ).  
556 These genes were tested for enrichment of the BPA DEGs and DMCs in our mouse study using MSEA. We  
557 further curated all publicly available full summary statistics for 61 human traits/diseases from various public  
558 repositories (**S1 Text and S11 Table**). This allowed us to apply MSEA to comprehensively assess the enrichment  
559 for human disease association among BPA transcriptomic signatures using the full-spectrum of large-scale human  
560 GWAS. For each tissue-specific gene signature, we used the SNPs within a 50kb chromosomal distance as the  
561 representing SNPs for that gene. The trait/disease association p-values of the SNPs were then extracted from each  
562 GWAS and compared to the p-values of SNPs of random sets of genes to assess whether the BPA signatures were  
563 more likely to show stronger disease association in human GWAS (**S1 Text and S7 Fig**). This strategy has been  
564 successfully used in our previous animal model studies to assess the connection of genes affected by  
565 environmental perturbations such as diets and trauma to various human diseases [41, 92].

566

### 567 **Acknowledgments**

568 LS is supported by UCLA Dissertation Year Fellowship, Eureka Scholarship, Hyde Scholarship, Burroughs  
569 Wellcome Fund Inter-School Program in Metabolic Diseases Fellowship, and China Scholarship Council. XY is

570 supported by NIH DK104363 and NS103088, and Leducq Foundation. We would also like to thank Zhe Ying's  
571 assistance in collecting mice hypothalamus tissue, and Dr. Guanglin Zhang's assistance in the RRBS experiments.

## 572 **Competing interests**

573 The authors declare that they have no competing interest.

## 574 **References**

- 575 1. Barouki, R., et al., *Developmental origins of non-communicable disease: implications for research and*  
576 *public health*. Environ Health, 2012. **11**: p. 42.
- 577 2. Boekelheide, K., et al., *Predicting later-life outcomes of early-life exposures*. Environ Health Perspect,  
578 2012. **120**(10): p. 1353-61.
- 579 3. Heindel, J.J. and L.N. Vandenberg, *Developmental origins of health and disease: a paradigm for*  
580 *understanding disease etiology and prevention*. Current opinion in pediatrics, 2015. **27**(2): p. 248.
- 581 4. Vandenberg, L.N., et al., *Human exposure to bisphenol A (BPA)*. Reprod Toxicol, 2007. **24**(2): p. 139-77.
- 582 5. Tsai, W.T., *Human health risk on environmental exposure to Bisphenol-A: a review*. J Environ Sci Health  
583 C Environ Carcinog Ecotoxicol Rev, 2006. **24**(2): p. 225-55.
- 584 6. Sun, C., et al., *Single laboratory validation of a method for the determination of Bisphenol A, Bisphenol A*  
585 *diglycidyl ether and its derivatives in canned foods by reversed-phase liquid chromatography*. J Chromatogr A,  
586 2006. **1129**(1): p. 145-8.
- 587 7. Calafat, A.M., et al., *Exposure of the U.S. population to bisphenol A and 4-tertiary-octylphenol: 2003-*  
588 *2004*. Environ Health Perspect, 2008. **116**(1): p. 39-44.
- 589 8. Rubin, B.S., et al., *Perinatal BPA exposure alters body weight and composition in a dose specific and sex*  
590 *specific manner: The addition of peripubertal exposure exacerbates adverse effects in female mice*. Reprod  
591 Toxicol, 2017. **68**: p. 130-144.
- 592 9. Hao, M., et al., *Urinary bisphenol A concentration and the risk of central obesity in Chinese adults: A*  
593 *prospective study*. J Diabetes, 2017.
- 594 10. Beydoun, H.A., et al., *Sex differences in the association of urinary bisphenol-A concentration with*  
595 *selected indices of glucose homeostasis among U.S. adults*. Ann Epidemiol, 2014. **24**(2): p. 90-7.
- 596 11. Teppala, S., S. Madhavan, and A. Shankar, *Bisphenol A and Metabolic Syndrome: Results from*  
597 *NHANES*. Int J Endocrinol, 2012. **2012**: p. 598180.

- 598 12. Mouneimne, Y., et al., *Bisphenol A urinary level, its correlates, and association with cardiometabolic*  
599 *risks in Lebanese urban adults*. Environ Monit Assess, 2017. **189**(10): p. 517.
- 600 13. Wassenaar, P.N.H., L. Trasande, and J. Legler, *Systematic Review and Meta-Analysis of Early-Life*  
601 *Exposure to Bisphenol A and Obesity-Related Outcomes in Rodents*. Environ Health Perspect, 2017. **125**(10): p.  
602 106001.
- 603 14. Han, C. and Y.C. Hong, *Bisphenol A, Hypertension, and Cardiovascular Diseases: Epidemiological,*  
604 *Laboratory, and Clinical Trial Evidence*. Curr Hypertens Rep, 2016. **18**(2): p. 11.
- 605 15. Ranciere, F., et al., *Bisphenol A and the risk of cardiometabolic disorders: a systematic review with meta-*  
606 *analysis of the epidemiological evidence*. Environ Health, 2015. **14**: p. 46.
- 607 16. Liu, J., et al., *Perinatal bisphenol A exposure and adult glucose homeostasis: identifying critical windows*  
608 *of exposure*. PLoS One, 2013. **8**(5): p. e64143.
- 609 17. Ryan, K.K., et al., *Perinatal exposure to bisphenol-a and the development of metabolic syndrome in CD-1*  
610 *mice*. Endocrinology, 2010. **151**(6): p. 2603-12.
- 611 18. Miyawaki, J., et al., *Perinatal and postnatal exposure to bisphenol a increases adipose tissue mass and*  
612 *serum cholesterol level in mice*. J Atheroscler Thromb, 2007. **14**(5): p. 245-52.
- 613 19. Rubin, B.S. and A.M. Soto, *Bisphenol A: Perinatal exposure and body weight*. Mol Cell Endocrinol,  
614 2009. **304**(1-2): p. 55-62.
- 615 20. Garcia-Arevalo, M., et al., *Exposure to bisphenol-A during pregnancy partially mimics the effects of a*  
616 *high-fat diet altering glucose homeostasis and gene expression in adult male mice*. PLoS One, 2014. **9**(6): p.  
617 e100214.
- 618 21. Manikkam, M., et al., *Plastics Derived Endocrine Disruptors (BPA, DEHP and DBP) Induce Epigenetic*  
619 *Transgenerational Inheritance of Obesity, Reproductive Disease and Sperm Epimutations*. PLoS One, 2013. **8**(1):  
620 p. e55387.

- 621 22. Susiarjo, M., et al., *Bisphenol a exposure disrupts metabolic health across multiple generations in the*  
622 *mouse*. *Endocrinology*, 2015. **156**(6): p. 2049-58.
- 623 23. Bansal, A., et al., *Sex- and Dose-Specific Effects of Maternal Bisphenol A Exposure on Pancreatic Islets*  
624 *of First- and Second-Generation Adult Mice Offspring*. *Environ Health Perspect*, 2017. **125**(9): p. 097022.
- 625 24. Camacho, J., et al., *The Memory of Environmental Chemical Exposure in C. elegans Is Dependent on the*  
626 *Jumonji Demethylases jmjd-2 and jmjd-3/utx-1*. *Cell Rep*, 2018. **23**(8): p. 2392-2404.
- 627 25. Baillie-Hamilton, P.F., *Chemical toxins: a hypothesis to explain the global obesity epidemic*. *J Altern*  
628 *Complement Med*, 2002. **8**(2): p. 185-92.
- 629 26. Heindel, J.J., *Endocrine disruptors and the obesity epidemic*. *Toxicol Sci*, 2003. **76**(2): p. 247-9.
- 630 27. Newbold, R.R., et al., *Effects of endocrine disruptors on obesity*. *Int J Androl*, 2008. **31**(2): p. 201-8.
- 631 28. EFS Authority, *Scientific opinion on the risks to public health related to the presence of bisphenol A*  
632 *(BPA) in foodstuffs*. *EFSA Journal*, 2015. **13**(1).
- 633 29. Beronius, A., et al., *The influence of study design and sex-differences on results from developmental*  
634 *neurotoxicity studies of bisphenol A: implications for toxicity testing*. *Toxicology*, 2013. **311**(1-2): p. 13-26.
- 635 30. Ariemma, F., et al., *Low-Dose Bisphenol-A Impairs Adipogenesis and Generates Dysfunctional 3T3-L1*  
636 *Adipocytes*. *PLoS One*, 2016. **11**(3): p. e0150762.
- 637 31. Ben-Jonathan, N., E.R. Hugo, and T.D. Brandebourg, *Effects of bisphenol A on adipokine release from*  
638 *human adipose tissue: Implications for the metabolic syndrome*. *Mol Cell Endocrinol*, 2009. **304**(1-2): p. 49-54.
- 639 32. Olsvik, P.A., K.H. Skjaerven, and L. Softeland, *Metabolic signatures of bisphenol A and genistein in*  
640 *Atlantic salmon liver cells*. *Chemosphere*, 2017. **189**: p. 730-743.
- 641 33. Lejonklou, M.H., et al., *Effects of Low-Dose Developmental Bisphenol A Exposure on Metabolic*  
642 *Parameters and Gene Expression in Male and Female Fischer 344 Rat Offspring*. *Environ Health Perspect*, 2017.  
643 **125**(6): p. 067018.

- 644 34. Anderson, O.S., et al., *Novel Epigenetic Biomarkers Mediating Bisphenol A Exposure and Metabolic*  
645 *Phenotypes in Female Mice*. *Endocrinology*, 2017. **158**(1): p. 31-40.
- 646 35. Ma, Y., et al., *Hepatic DNA methylation modifications in early development of rats resulting from*  
647 *perinatal BPA exposure contribute to insulin resistance in adulthood*. *Diabetologia*, 2013. **56**(9): p. 2059-67.
- 648 36. Taylor, J.A., et al., *Prenatal Exposure to Bisphenol A Disrupts Naturally Occurring Bimodal DNA*  
649 *Methylation at Proximal Promoter of fggy, an Obesity-relevant Gene Encoding a Carbohydrate Kinase, in*  
650 *Gonadal White Adipose Tissues of CD-1 Mice*. *Endocrinology*, 2017.
- 651 37. Faulk, C., et al., *Bisphenol A-associated alterations in genome-wide DNA methylation and gene*  
652 *expression patterns reveal sequence-dependent and non-monotonic effects in human fetal liver*. *Environ Epigenet*,  
653 2015. **1**(1).
- 654 38. Nahar, M.S., et al., *Bisphenol A-associated alterations in the expression and epigenetic regulation of*  
655 *genes encoding xenobiotic metabolizing enzymes in human fetal liver*. *Environ Mol Mutagen*, 2014. **55**(3): p. 184-  
656 95.
- 657 39. Messerlian, C., et al., *'Omics' and endocrine-disrupting chemicals—new paths forward*. *Nature Reviews*  
658 *Endocrinology*, 2017. **13**(12): p. 740.
- 659 40. Makinen, V.P., et al., *Integrative genomics reveals novel molecular pathways and gene networks for*  
660 *coronary artery disease*. *PLoS Genet*, 2014. **10**(7): p. e1004502.
- 661 41. Meng, Q., et al., *Systems Nutrigenomics Reveals Brain Gene Networks Linking Metabolic and Brain*  
662 *Disorders*. *EBioMedicine*, 2016. **7**: p. 157-66.
- 663 42. Shu, L., et al., *Shared genetic regulatory networks for cardiovascular disease and type 2 diabetes in*  
664 *multiple populations of diverse ethnicities in the United States*. *PLoS Genet*, 2017. **13**(9): p. e1007040.
- 665 43. Krishnan, K.C., et al., *Integration of Multi-omics Data from Mouse Diversity Panel Highlights*  
666 *Mitochondrial Dysfunction in Non-alcoholic Fatty Liver Disease*. *Cell Systems*, 2018.

- 667 44. Dolinoy, D.C., D. Huang, and R.L. Jirtle, *Maternal nutrient supplementation counteracts bisphenol A-*  
668 *induced DNA hypomethylation in early development.* Proc Natl Acad Sci U S A, 2007. **104**(32): p. 13056-61.
- 669 45. Susiarjo, M., et al., *Bisphenol a exposure disrupts genomic imprinting in the mouse.* PLoS Genet, 2013.  
670 **9**(4): p. e1003401.
- 671 46. Bromer, J.G., et al., *Bisphenol-A exposure in utero leads to epigenetic alterations in the developmental*  
672 *programming of uterine estrogen response.* FASEB J, 2010. **24**(7): p. 2273-80.
- 673 47. Lewinska, M., et al., *Hidden disease susceptibility and sexual dimorphism in the heterozygous knockout*  
674 *of Cyp51 from cholesterol synthesis.* PLoS One, 2014. **9**(11): p. e112787.
- 675 48. Keber, R., D. Rozman, and S. Horvat, *Sterols in spermatogenesis and sperm maturation.* J Lipid Res,  
676 2013. **54**(1): p. 20-33.
- 677 49. Shu, L., et al., *Mergeomics: multidimensional data integration to identify pathogenic perturbations to*  
678 *biological systems.* BMC Genomics, 2016. **17**(1): p. 874.
- 679 50. Marmugi, A., et al., *Low doses of bisphenol A induce gene expression related to lipid synthesis and*  
680 *trigger triglyceride accumulation in adult mouse liver.* Hepatology, 2012. **55**(2): p. 395-407.
- 681 51. Melis, J.P., et al., *In vivo murine hepatic microRNA and mRNA expression signatures predicting the (non-*  
682 *)genotoxic carcinogenic potential of chemicals.* Arch Toxicol, 2014. **88**(4): p. 1023-34.
- 683 52. Lou, S., et al., *Whole-genome bisulfite sequencing of multiple individuals reveals complementary roles of*  
684 *promoter and gene body methylation in transcriptional regulation.* Genome Biol, 2014. **15**(7): p. 408.
- 685 53. Faulk, C., et al., *Detection of differential DNA methylation in repetitive DNA of mice and humans*  
686 *perinatally exposed to bisphenol A.* Epigenetics, 2016. **11**(7): p. 489-500.
- 687 54. Acconcia, F., V. Pallottini, and M. Marino, *Molecular Mechanisms of Action of BPA.* Dose Response,  
688 2015. **13**(4): p. 1559325815610582.
- 689 55. MacKay, H. and A. Abizaid, *A plurality of molecular targets: The receptor ecosystem for bisphenol-A*  
690 *(BPA).* Horm Behav, 2017.



- 691 56. Wang, J., et al., *The environmental obesogen bisphenol A promotes adipogenesis by increasing the*  
692 *amount of 11beta-hydroxysteroid dehydrogenase type 1 in the adipose tissue of children.* Int J Obes (Lond), 2013.  
693 **37**(7): p. 999-1005.
- 694 57. Ahmed, S. and E. Atlas, *Bisphenol S- and bisphenol A-induced adipogenesis of murine preadipocytes*  
695 *occurs through direct peroxisome proliferator-activated receptor gamma activation.* Int J Obes (Lond), 2016.  
696 **40**(10): p. 1566-1573.
- 697 58. Vafeiadi, M., et al., *Association of early life exposure to bisphenol A with obesity and cardiometabolic*  
698 *traits in childhood.* Environ Res, 2016. **146**: p. 379-87.
- 699 59. Marbach, D., et al., *Tissue-specific regulatory circuits reveal variable modular perturbations across*  
700 *complex diseases.* Nat Methods, 2016. **13**(4): p. 366-70.
- 701 60. Nishi-Tatsumi, M., et al., *A key role of nuclear factor Y in the refeeding response of fatty acid synthase in*  
702 *adipocytes.* FEBS Lett, 2017. **591**(7): p. 965-978.
- 703 61. Zhang, B., et al., *Integrated systems approach identifies genetic nodes and networks in late-onset*  
704 *Alzheimer's disease.* Cell, 2013. **153**(3): p. 707-20.
- 705 62. Inadera, H., *Neurological Effects of Bisphenol A and its Analogues.* Int J Med Sci, 2015. **12**(12): p. 926-  
706 36.
- 707 63. Welter, D., et al., *The NHGRI GWAS Catalog, a curated resource of SNP-trait associations.* Nucleic  
708 Acids Res, 2014. **42**(Database issue): p. D1001-6.
- 709 64. Kim, J.H., et al., *Perinatal bisphenol A exposure promotes dose-dependent alterations of the mouse*  
710 *methylome.* BMC Genomics, 2014. **15**: p. 30.
- 711 65. Ilagan, Y., et al., *Bisphenol-A exposure in utero programs a sexually dimorphic estrogenic state of*  
712 *hepatic metabolic gene expression.* Reprod Toxicol, 2017. **71**: p. 84-94.
- 713 66. Ke, Z., et al., *Bisphenol A exposure may induce hepatic lipid accumulation via reprogramming the DNA*  
714 *methylation patterns of genes involved in lipid metabolism.* Scientific reports, 2016. **6**.

- 715 67. Yang, S., et al., *Dysregulated Autophagy in Hepatocytes Promotes Bisphenol A-Induced Hepatic Lipid*  
716 *Accumulation in Male Mice*. *Endocrinology*, 2017. **158**(9): p. 2799-2812.
- 717 68. Shimpi, P.C., et al., *Hepatic Lipid Accumulation and Nrf2 Expression following Perinatal and*  
718 *Peripubertal Exposure to Bisphenol A in a Mouse Model of Nonalcoholic Liver Disease*. *Environ Health Perspect*,  
719 2017. **125**(8): p. 087005.
- 720 69. Karlsson, O. and A.A. Baccarelli, *Environmental Health and Long Non-coding RNAs*. *Curr Environ*  
721 *Health Rep*, 2016. **3**(3): p. 178-87.
- 722 70. Somm, E., et al., *Perinatal exposure to bisphenol a alters early adipogenesis in the rat*. *Environ Health*  
723 *Perspect*, 2009. **117**(10): p. 1549-55.
- 724 71. Vom Saal, F.S., et al., *The estrogenic endocrine disrupting chemical bisphenol A (BPA) and obesity*. *Mol*  
725 *Cell Endocrinol*, 2012. **354**(1-2): p. 74-84.
- 726 72. Angle, B.M., et al., *Metabolic disruption in male mice due to fetal exposure to low but not high doses of*  
727 *bisphenol A (BPA): evidence for effects on body weight, food intake, adipocytes, leptin, adiponectin, insulin and*  
728 *glucose regulation*. *Reprod Toxicol*, 2013. **42**: p. 256-68.
- 729 73. Vercruyse, P., et al., *Hypothalamic alterations in neurodegenerative diseases and their relation to*  
730 *abnormal energy metabolism*. *Frontiers in Molecular Neuroscience*, 2018. **11**: p. 2.
- 731 74. MacKay, H., Z.R. Patterson, and A. Abizaid, *Perinatal Exposure to Low-Dose Bisphenol-A Disrupts the*  
732 *Structural and Functional Development of the Hypothalamic Feeding Circuitry*. *Endocrinology*, 2017. **158**(4): p.  
733 768-777.
- 734 75. Jones, P.A., *Functions of DNA methylation: islands, start sites, gene bodies and beyond*. *Nat Rev Genet*,  
735 2012. **13**(7): p. 484-92.
- 736 76. Patil, V., R.L. Ward, and L.B. Hesson, *The evidence for functional non-CpG methylation in mammalian*  
737 *cells*. *Epigenetics*, 2014. **9**(6): p. 823-8.

- 738 77. Oldfield, A.J., et al., *Histone-fold domain protein NF-Y promotes chromatin accessibility for cell type-*  
739 *specific master transcription factors*. Mol Cell, 2014. **55**(5): p. 708-22.
- 740 78. Gracia, A., et al., *Fatty acid synthase methylation levels in adipose tissue: effects of an obesogenic diet*  
741 *and phenol compounds*. Genes Nutr, 2014. **9**(4): p. 411.
- 742 79. Hui, S.T., et al., *The genetic architecture of NAFLD among inbred strains of mice*. Elife, 2015. **4**.
- 743 80. Dallio, M., et al., *Role of bisphenol A as environmental factor in the promotion of non-alcoholic fatty*  
744 *liver disease: in vitro and clinical study*. Alimentary pharmacology & therapeutics, 2018.
- 745 81. Veiga-Lopez, A., et al., *Gender-Specific Effects on Gestational Length and Birth Weight by Early*  
746 *Pregnancy BPA Exposure*. J Clin Endocrinol Metab, 2015. **100**(11): p. E1394-403.
- 747 82. Andrews, S., *FastQC: a quality control tool for high throughput sequence data*. 2010.
- 748 83. Pertea, M., et al., *Transcript-level expression analysis of RNA-seq experiments with HISAT, StringTie and*  
749 *Ballgown*. Nat Protoc, 2016. **11**(9): p. 1650-67.
- 750 84. Love, M.I., W. Huber, and S. Anders, *Moderated estimation of fold change and dispersion for RNA-seq*  
751 *data with DESeq2*. Genome Biol, 2014. **15**(12): p. 550.
- 752 85. Storey, J.D. and R. Tibshirani, *Statistical significance for genomewide studies*. Proc Natl Acad Sci U S A,  
753 2003. **100**(16): p. 9440-5.
- 754 86. Xi, Y. and W. Li, *BSMAP: whole genome bisulfite sequence MAPping program*. BMC Bioinformatics,  
755 2009. **10**: p. 232.
- 756 87. Sun, D., et al., *MOABS: model based analysis of bisulfite sequencing data*. Genome Biol, 2014. **15**(2): p.  
757 R38.
- 758 88. Cavalcante, R.G. and M.A. Sartor, *annotatr: genomic regions in context*. Bioinformatics, 2017. **33**(15): p.  
759 2381-2383.
- 760 89. Kanehisa, M. and S. Goto, *KEGG: kyoto encyclopedia of genes and genomes*. Nucleic Acids Res, 2000.  
761 **28**(1): p. 27-30.

- 762 90. Croft, D., et al., *The Reactome pathway knowledgebase*. Nucleic Acids Res, 2014. **42**(Database issue): p.  
763 D472-7.
- 764 91. Shannon, P., et al., *Cytoscape: a software environment for integrated models of biomolecular interaction*  
765 *networks*. Genome Res, 2003. **13**(11): p. 2498-504.
- 766 92. Meng, Q., et al., *Traumatic Brain Injury Induces Genome-Wide Transcriptomic, Methylomic, and*  
767 *Network Perturbations in Brain and Blood Predicting Neurological Disorders*. EBioMedicine, 2017. **16**: p. 184-  
768 194.
- 769

## 770 **Supporting information captions**

771 S1 Text. Supplemental Methods.

772 S1 Fig. Body weight of male and female offspring mice at weaning age by litters. Red arrows indicate offspring  
773 male mice selected for molecular profiling.

774 S2 Fig. Prenatal BPA exposure induced expression change for genes from the adipocyte differentiation,  
775 triglyceride biosynthesis, glucose metabolism, and core histone genes in the adipose tissue. P-values for  
776 enrichment of pathway genes among DEGs (shown in parenthesis in each panel heading) were determined by  
777 MSEA. \* $p < 0.05$  in differential expression tests for individual genes by DEseq2; \*\*FDR < 5% in differential  
778 expression tests for individual genes by DEseq2.

779 S3 Fig. Comparison of the liver DEGs and their functional annotations against published datasets in GEO. (A)  
780 Descriptions of the study design of different datasets. (B) Venn Diagram of the DEGs identified in different  
781 datasets. DEGs were determined by Limma at  $p < 0.01$ . (C) The percentage of DEGs (from the datasets in each  
782 row header) that are replicated (by the datasets in each column header). Numbers in parenthesis indicate the  
783 percentage of DEGs that are replicated by at least one independent study, and the significance of the replication  
784 percentage determined by permutation test. (D) Venn Diagram of the functional annotations for the DEGs  
785 identified in different datasets. Functional annotations were determined by MSEA at FDR < 5%. (E) The  
786 percentage of functional annotations (from the datasets in each row header) that are replicated (by the datasets in  
787 each column header). Numbers in parenthesis indicate the percentage of annotations that are replicated by at least  
788 one independent study, and the significance of the replication percentage determined by permutation test.

789 S4 Fig. Gene body location distribution for hyper- and hypo- methylated DMC s in adipose, hypothalamus, and  
790 liver.

- 791 S5 Fig. Quantile-quantile plots for the absolute Pearson correlation with local DMC for DEGs and Non DEGs in  
792 adipose, hypothalamus, and liver tissue. Statistical difference of the distribution of correlation value between  
793 DEGs (FDR < 5%) and non DEGs is determined by the Kolmogorov–Smirnov test.
- 794 S6 Fig. Scatter plots of correlations between DEG expression levels and DMC methylation ratios for *Slc25a1* in  
795 adipose, *Mvk* in hypothalamus, and *Gm20319* in liver.
- 796 S7 Fig. Schematic illustration of MSEA
- 797 S8 Fig. Schematic illustration (A) and key driver identification algorithms (B) of wKDA.
- 798 S1 Table. List of DEGs with  $p < 0.05$  in adipose, hypothalamus and liver tissue following prenatal exposure to  
799 BPA.
- 800 S2 Table. Count of DEGs in adipose, hypothalamus and liver tissue following prenatal exposure to BPA.
- 801 S3 Table. Results of functional annotation of DEGs in in adipose, hypothalamus and liver tissue following  
802 prenatal exposure to BPA
- 803 S4 Table. Count of differentially methylated regions in hypothalamus and liver tissue following prenatal exposure  
804 to BPA.
- 805 S5 Table. Results of functional annotation of DMCs in in adipose, hypothalamus and liver tissue following  
806 prenatal exposure to BPA.
- 807 S6 Table. List of pairs of DEGs and local DMCs with significant correlation ( $p < 0.05$ ) in expression level and  
808 methylation ratio
- 809 S7 Table. List of transcription factors whose downstream targets were significantly enriched for DEGs ( $p < 0.05$ ).
- 810 S8 Table. Data resources and references for the construction of Bayesian gene-gene regulatory networks.
- 811 S9 Table. List of tissue-specific key drivers with FDR < 1%

812 S10 Table. List of DEGs with significant correlation between expression level, methylation ratio of local DMCs,  
813 and cardiometabolic traits ( $p < 0.05$ ).

814 S11 Table. Source of publicly available full summary-level statistics from human genome-wide association  
815 studies.

816 **Tables**

817 Table 1. Top 5 human traits whose associated genes in genome-wide association studies are enriched for  
818 differentially methylated CpGs (DMCs) across adipose, hypothalamus and liver at FDR < 1% in MSEA.

| <b>Human trait</b>                 | <b>Adipose</b> |            | <b>Hypothalamus</b> |            | <b>Liver</b> |            |
|------------------------------------|----------------|------------|---------------------|------------|--------------|------------|
|                                    | <b>P</b>       | <b>FDR</b> | <b>P</b>            | <b>FDR</b> | <b>P</b>     | <b>FDR</b> |
| Obesity-related traits             | 1.28E-16       | 0.00%      | 3.03E-15            | 0.00%      | 2.71E-19     | 0.00%      |
| Body mass index                    | 1.30E-13       | 0.00%      | 3.74E-07            | 0.00%      | 9.66E-12     | 0.00%      |
| Post bronchodilator FEV1/FVC ratio | 8.17E-09       | 0.00%      | 1.45E-08            | 0.00%      | 3.67E-07     | 0.00%      |
| Type 2 diabetes                    | 1.21E-05       | 0.03%      | 8.97E-09            | 0.00%      | 0.001243     | 0.92%      |
| Platelet distribution width        | 8.16E-08       | 0.00%      | 7.62E-05            | 0.16%      | 5.20E-05     | 0.12%      |



819 **Figures**

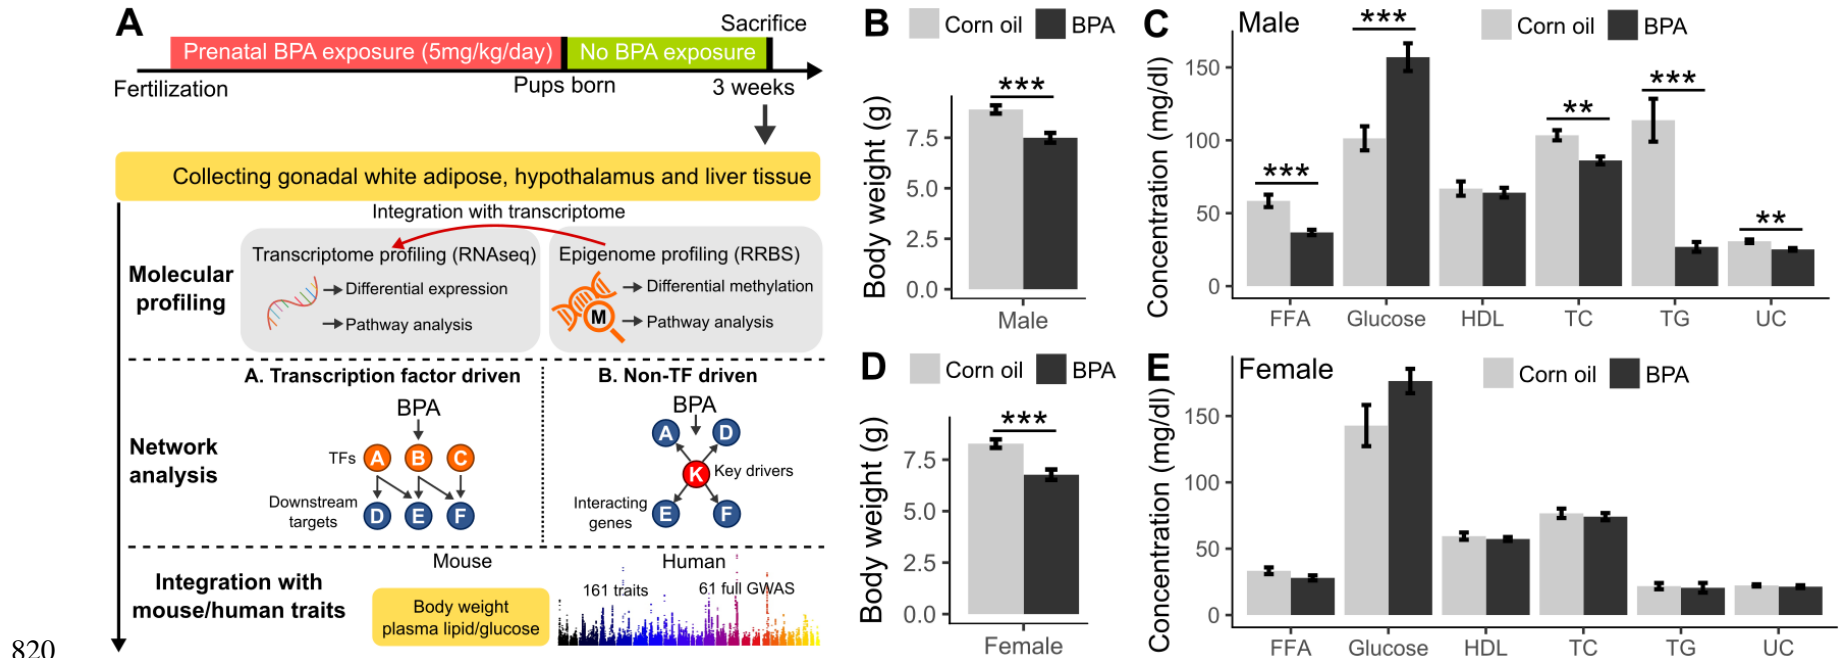

820

821 **Fig 1. Overall study design and the measurements of metabolic traits in male and female offspring.** (A) Framework of multi-omics  
 822 approaches to investigate the impact of prenatal BPA exposure. B-C) Comparison of body weight, serum lipids and glucose level in male mice at  
 823 weaning age. D-E) Comparison of body weight, serum lipids and glucose level in female mice at weaning age. FFA: free fatty acid; HDL: high-  
 824 density lipoprotein cholesterol; TC: total cholesterol; TG: triglyceride; UC: unesterified cholesterol. \*  $p < 0.05$ , \*\*  $p < 0.01$ , \*\*\*  $p < 0.001$  by two-  
 825 sided Student's T-test. N=9-13 mice (3-4 litters from different dams)/group.

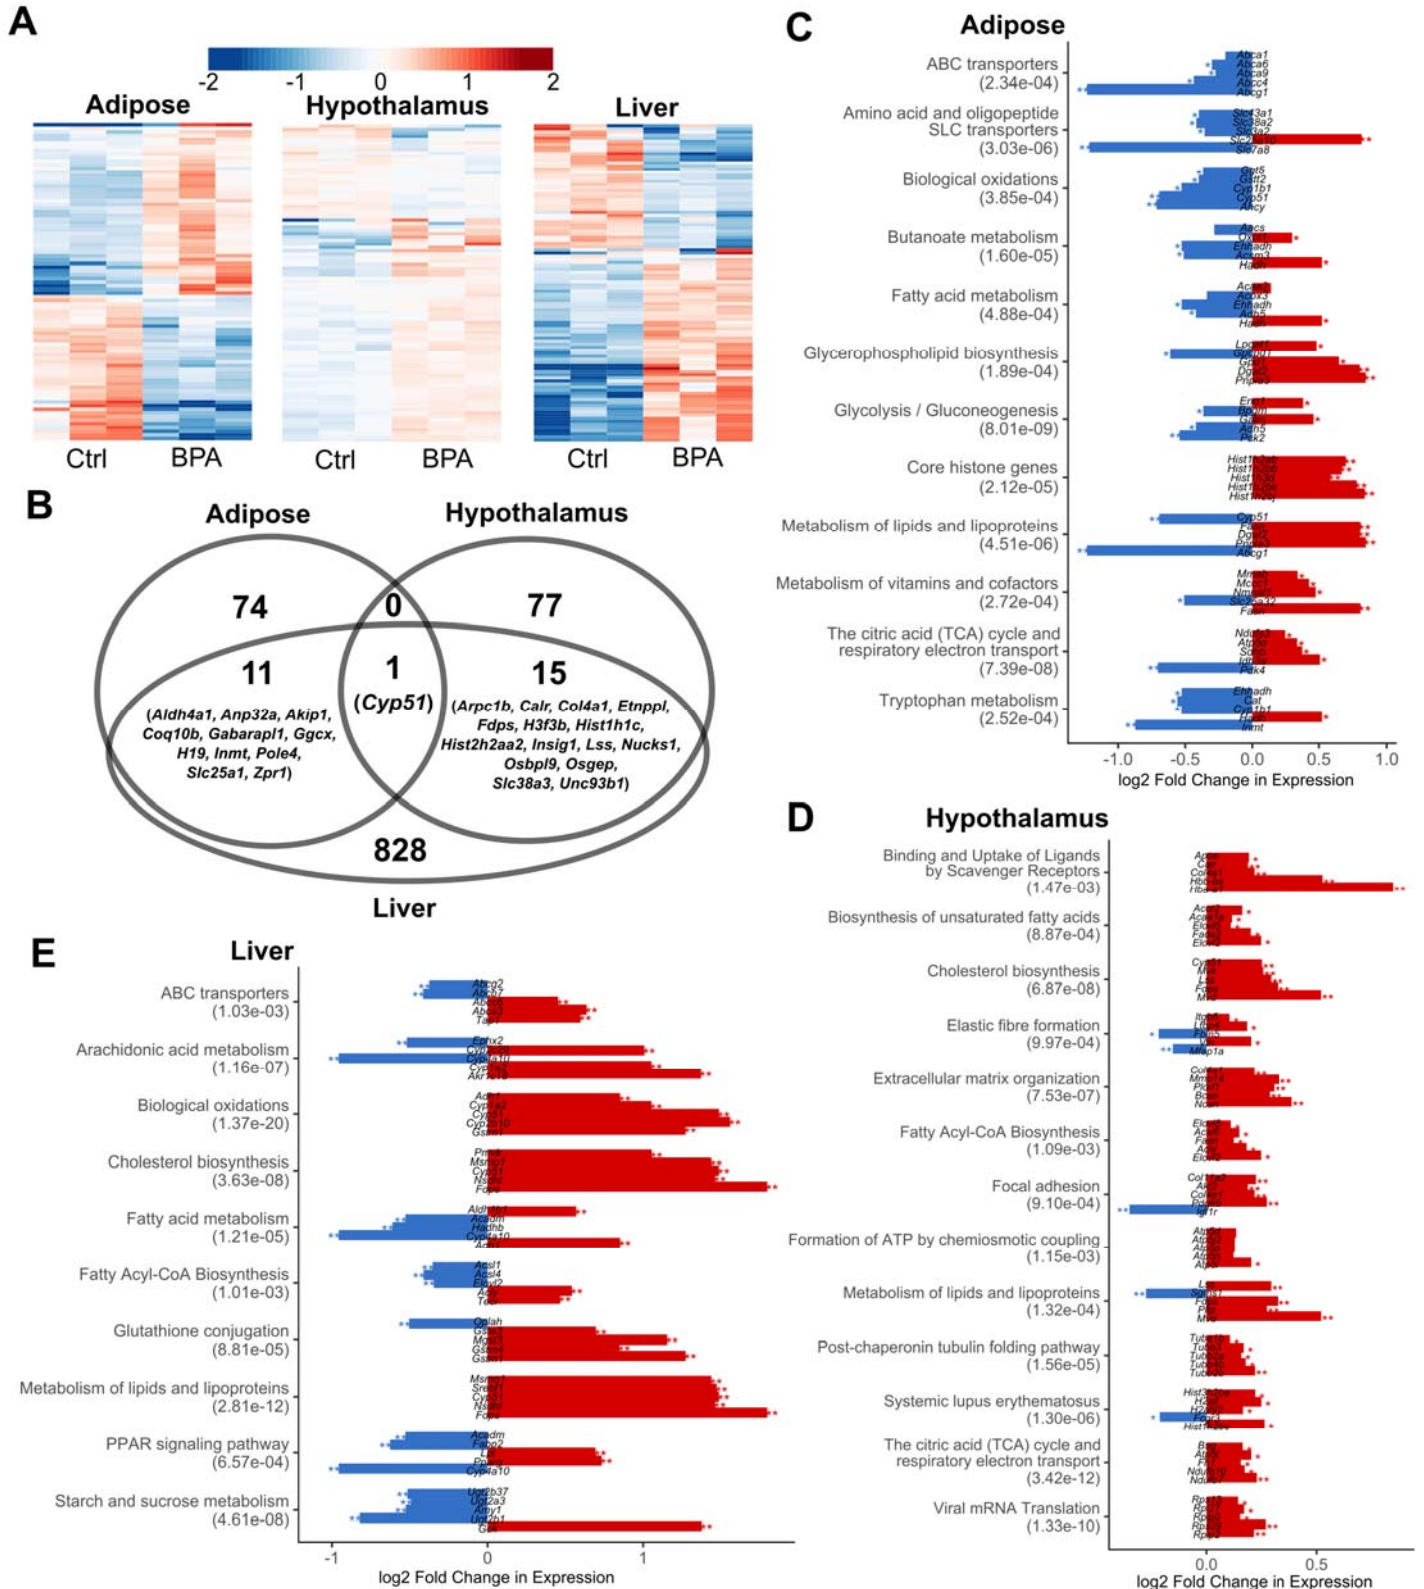

827 **Fig 2. Prenatal BPA exposure induced transcriptomic alterations in adipose, hypothalamus and liver.** (A)  
828 Heatmap of expression changes in adipose, hypothalamus and liver for the top 100 differentially expressed genes  
829 (DEGs) affected by BPA. Color indicates fold change of expression, with red and blue indicating upregulation  
830 and downregulation by BPA. (B) Venn Diagram demonstrating tissue-specific and shared DEGs between tissues.  
831 (C-E) Significantly enriched pathways (FDR < 5%) among DEGs from each tissue. Enrichment p-value (shown in  
832 parenthesis following the name of functional annotation) is determined by MSEA. The fold change and statistical  
833 significance for the top 5 differentially expressed genes in each pathway are shown. \*,  $p < 0.05$ ; \*\*, FDR < 5% in  
834 differential expression analysis using DEseq2.

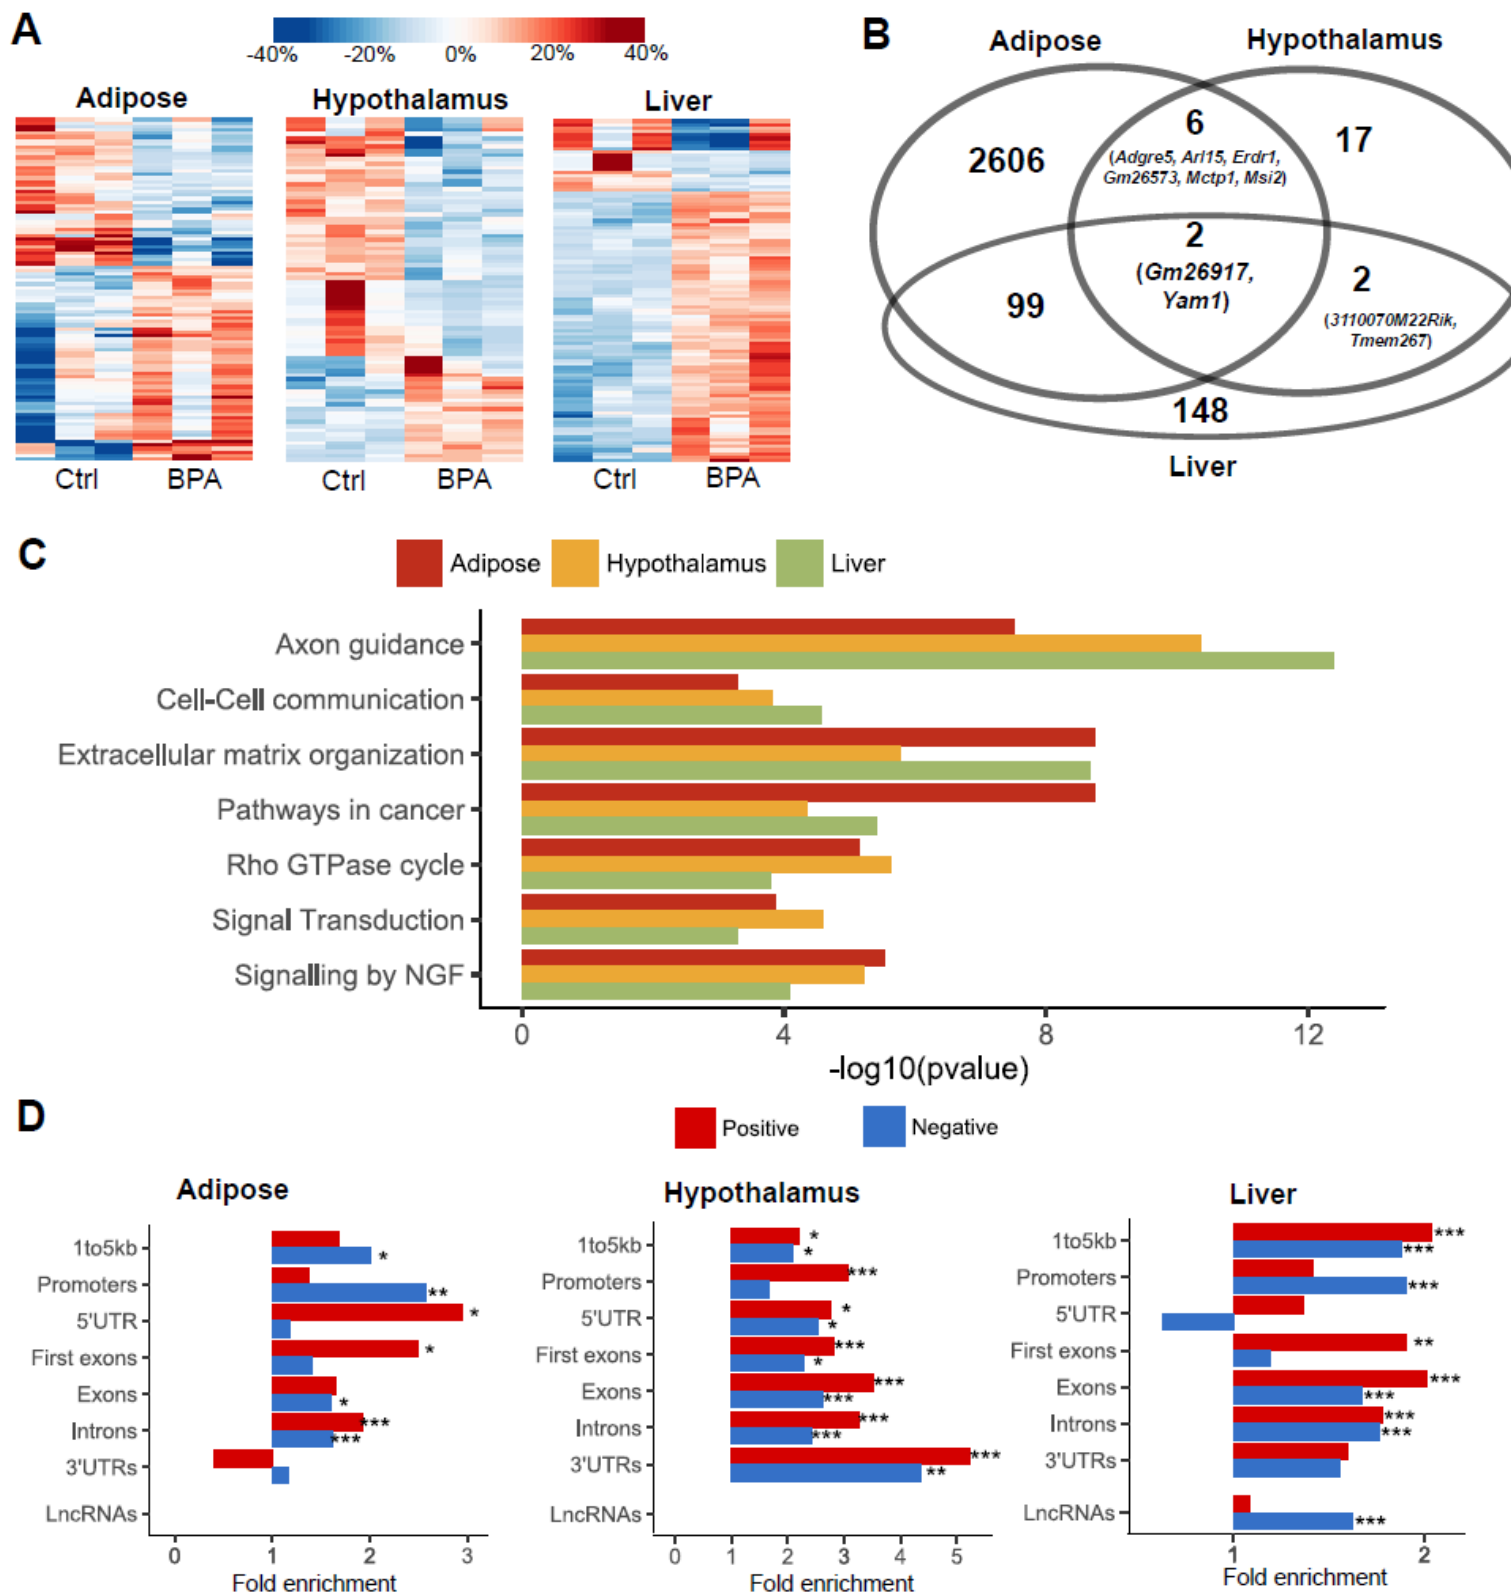

836 **Fig 3. Prenatal BPA exposure induced methylomic level alteration in adipose, hypothalamus and liver.** (A)  
837 Heatmap of methylation level changes for the top 100 differentially methylated CpGs (DMCs). Color indicates  
838 change in methylation ratio, with red and blue indicating upregulation and downregulation by BPA. (B) Venn  
839 Diagram of genes with local DMCs between tissues shows tissue-specific and shared genes mapped to DMCs. (C)  
840 Significantly enriched pathways that satisfied  $FDR < 1\%$  across DMCs from adipose, hypothalamus, and liver  
841 tissues. Enrichment p-value is determined by MSEA. (D) Fold enrichment for positive correlations (red bars) or  
842 negatively correlations (blue bars) between DMCs and local DEGs, assessed by different gene regions. \*,  $p <$   
843  $0.05$ ; \*\*,  $p < 0.01$ ; \*\*\*,  $p < 0.0001$ ; enrichment p-values were determined using Fisher's exact test.

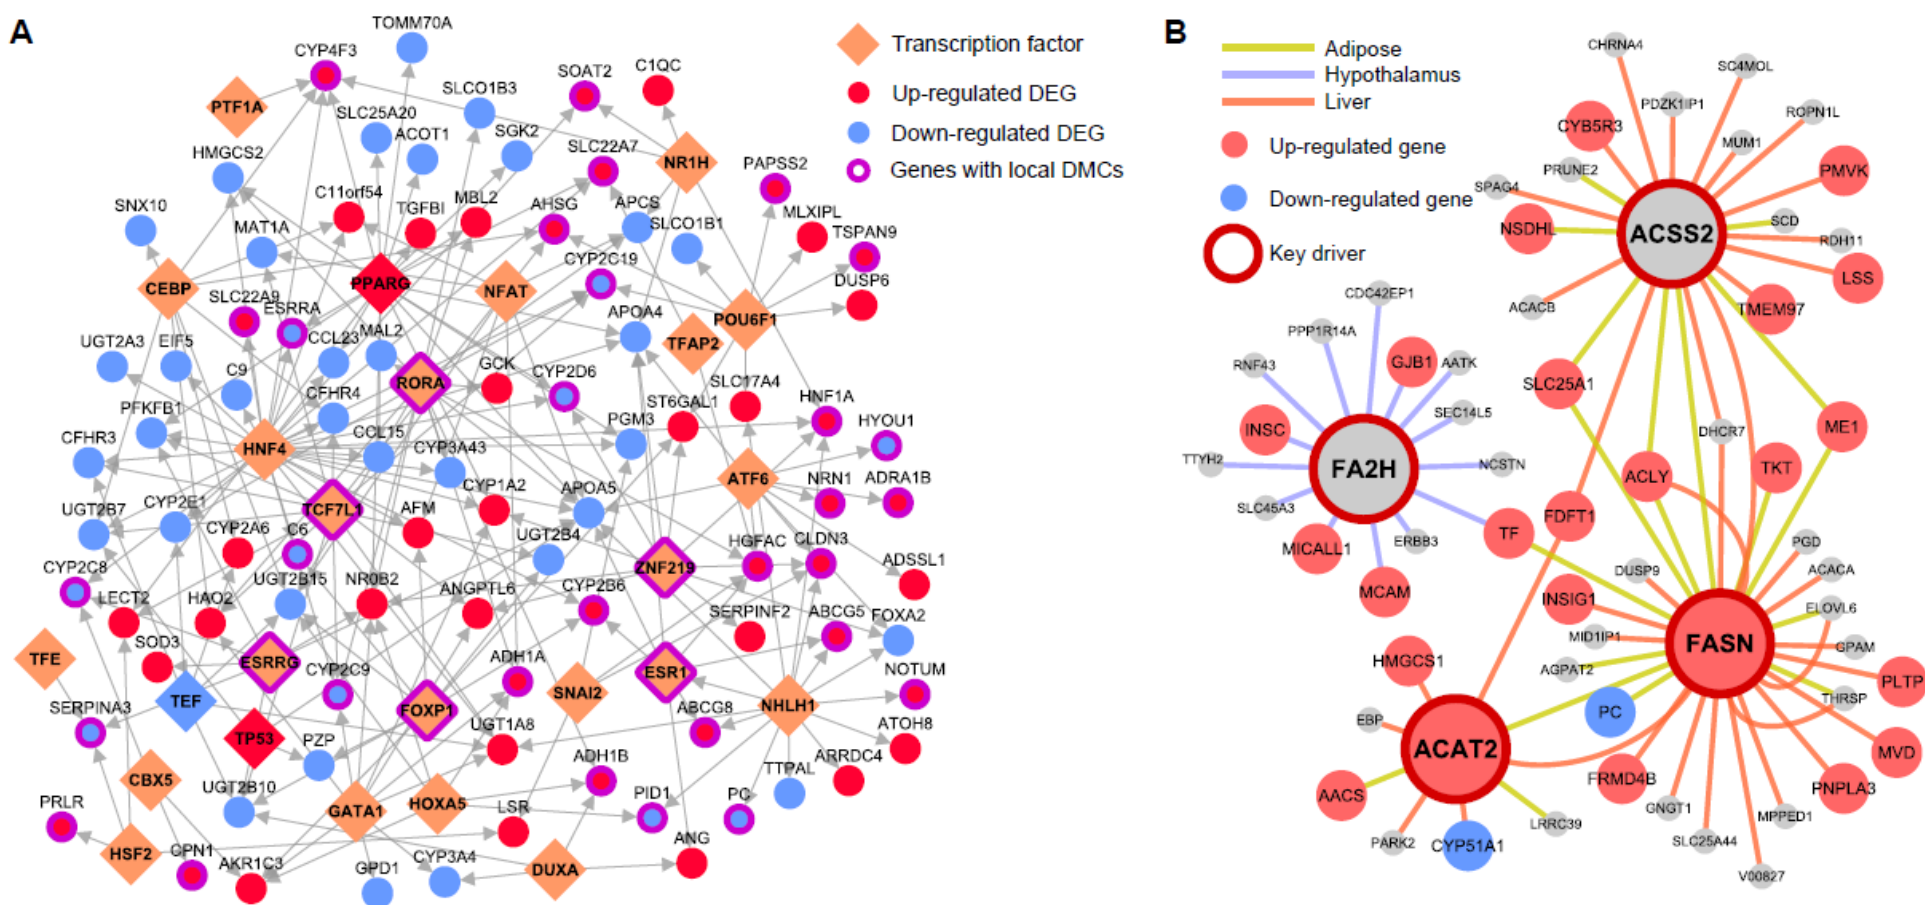

844 **Fig 4. Transcription factors and key drivers orchestrate BPA induced gene expression level changes.** (A) Liver transcription factor  
 845 regulatory networks for the top ranked transcription factors (FDR < 5%) based on enrichment of liver DEGs among TF downstream targets.  
 846 Network topology was based on FANTOM5. For TFs with > 20% overlapping downstream targets, only the TF with the lowest FDR is shown. (B)  
 847 Gene-gene regulatory subnetworks (Bayesian networks) for cross-tissue key drivers. Network topology was based on Bayesian network modeling

848 of each tissue using genetic and transcriptome datasets from mouse and human populations. For each tissue, if  $\geq 2$  datasets were available for a  
849 given tissue, a network for each dataset was constructed and a consensus network was derived by keeping only the high confidence network edges  
850 between genes (edges appearing in  $\geq 2$  studies).



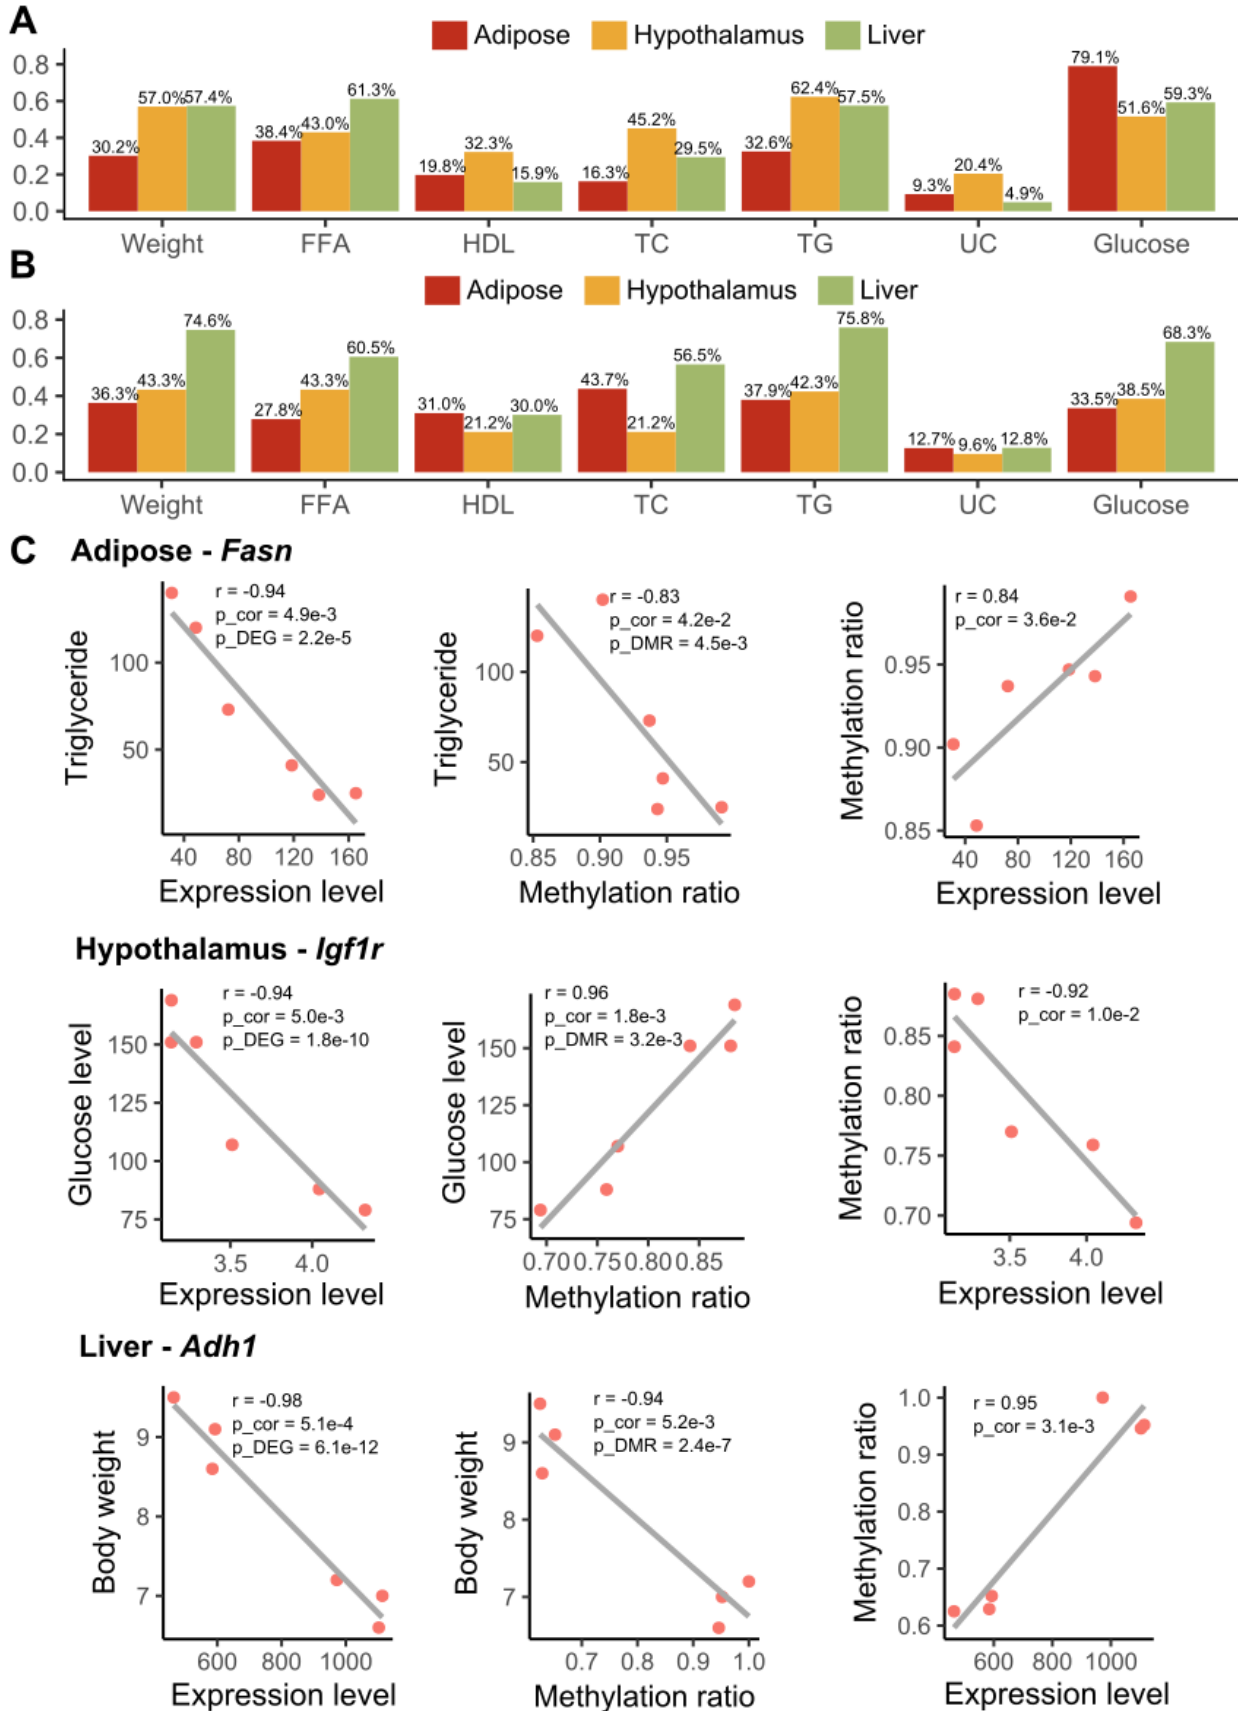



852 **Fig 5. Correlation between gene expression, methylation and metabolic traits.** (A) Percentage of tissue-  
853 specific DEGs that are correlated with metabolic traits ( $p < 0.05$ ). (B) Percentage of tissue-specific DMCs that are  
854 correlated with metabolic traits ( $p < 0.05$ ). (A-B) p-values were determined using Pearson correlation test. (C)  
855 Pair-wise correlation between expression level, methylation ratio and metabolic profiles (triglyceride, glucose  
856 level, body weight) for *Fasn*, *Igf1r* and *Adh1*. P<sub>cor</sub>, p-value was determined using Pearson correction test;  
857 P<sub>DEG</sub> was determined using differential expression test; P<sub>DMC</sub> was determined using differential methylation  
858 test. Each dot represents a mouse.

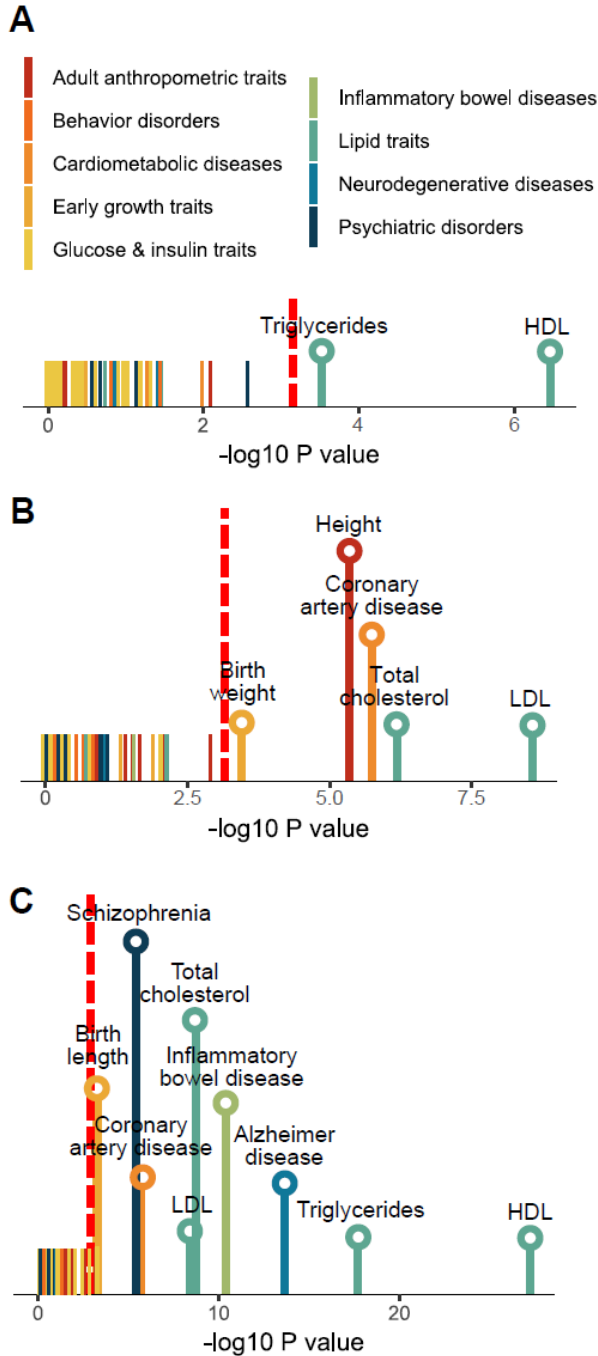

859

860

**Fig 6. Association of differential expression signatures from adipose (A), hypothalamus (B) and liver (C)**

861

**with 61 human traits/diseases, color coded into nine primary categories. P-values are determined using**

862

MSEA. Red dashed line indicates the cutoff for Bonferroni-corrected  $p = 0.05$ . Names of traits/diseases whose p-

863

values didn't pass Bonferroni-corrected cutoff were not shown.
